# Supplementary material for: Therapeutic Targeting of Transcription Factors to Control the Cytokine Release Syndrome in COVID-19
Source: Front Pharmacol. 2021 Jun 7;12:673485. doi: 10.3389/fphar.2021.673485 (PMC8215608; doi:10.3389/fphar.2021.673485)
Supplement: Supplementary file 1 [file Table2.XLSX]

## Sheet: notes
Supplementary Table S2. Correlations of TF-cytokine pairs in single cells from BALFs of COVID-19 patients

## Sheet: all.correlation
TF name	Cytokine name	source	Activation(cytreg)?	Repression(cytreg)?	correlation.coefficient	pvalue	padj	log2(padj)	cell type
FOS	IL1RN	literature	1	0	0.321238	0	0	1000	Macrophages
IRF7	TNFSF10	literature	1	0	0.350867	0	0	1000	Macrophages
STAT1	TNFSF10	literature	1	0	0.304778	0	0	1000	Macrophages
STAT1	TNFSF13B	literature	0	0	0.349154	0	0	1000	Macrophages
IRF7	TNFSF10	literature	1	0	0.375777	5.11363e-260	1.33977e-257	853.314	Neutrophils
IRF2	TNFSF13B	both	1	0	0.322509	4.68773e-239	3.89752e-238	788.656	Macrophages
MAFB	CCL2	literature	1	0	0.256778	4.13852e-235	3.25489e-234	775.629	Macrophages
HIF1A	TNFSF13B	literature	1	0	0.279599	1.22869e-233	9.40917e-233	770.775	Macrophages
ATF3	CCL3	literature	0	3	0.320807	3.35046e-212	2.32139e-211	699.712	Macrophages
STAT3	IL1RN	literature	1	0	0.290466	9.48881e-209	6.0027e-208	688.375	Macrophages
RELA	IL1RN	literature	1	0	0.376119	2.92445e-205	1.77295e-204	676.847	Macrophages
ATF3	CCL4L2	eY1H	0	0	0.356391	2.21772e-198	1.24107e-197	654.108	Macrophages
NFKB1	IL1RN	literature	0	0	0.348227	5.0586e-198	2.77746e-197	652.946	Macrophages
STAT1	CCL3	literature	1	0	0.237335	1.33359e-175	5.97036e-175	578.76	Macrophages
REL	CCL4L2	eY1H	0	0	0.36851	1.70716e-173	7.30564e-173	571.825	Macrophages
KLF3	IL1RN	eY1H	0	0	0.322135	4.47771e-171	1.86145e-170	563.831	Macrophages
MEF2A	IL1RN	literature	0	0	0.31165	1.0145e-169	4.10028e-169	559.37	Macrophages
STAT1	CXCL11	literature	0	0	0.312956	2.72835e-168	1.0729e-167	554.66	Macrophages
NFKB1	TNFSF13B	literature	0	0	0.317108	4.12095e-168	1.59893e-167	554.085	Macrophages
NFE2L2	CXCL8	literature	1	0	0.34048	2.6704e-165	9.71359e-165	544.838	Macrophages
IRF7	CXCL10	literature	3	0	0.226268	1.63484e-164	5.80167e-164	542.26	Macrophages
STAT6	IL1RN	literature	0	0	0.298342	7.21556e-164	2.49968e-163	540.153	Macrophages
REL	TNFSF13B	literature	2	0	0.280929	8.46706e-155	2.7999e-154	510.092	Macrophages
RELA	TNFSF13B	literature	1	0	0.324356	1.07156e-154	3.50363e-154	509.768	Macrophages
IRF2	TNFSF10	both	0	0	0.260033	6.72134e-150	2.12599e-149	493.879	Macrophages
RUNX1	CCL3	literature	2	0	0.283976	5.03521e-146	1.57553e-145	481.024	Macrophages
IRF1	TNFSF13B	literature	2	0	0.22697	6.63448e-146	2.05386e-145	480.641	Macrophages
IRF7	TNFSF10	literature	1	0	0.44481	1.40256e-143	2.39837e-141	467.13	CD8 T cells
BCL6	CCL3	literature	0	1	0.315345	1.11144e-139	3.33432e-139	460.011	Macrophages
STAT1	CXCL10	literature	5	0	0.204131	1.10595e-137	3.28401e-137	453.389	Macrophages
JUND	CXCL8	literature	1	0	0.294067	9.23626e-136	2.66114e-135	447.048	Macrophages
ETS2	CXCL8	literature	1	0	0.386528	4.5586e-132	1.28791e-131	434.808	Macrophages
IRF8	TNFSF13B	literature	0	1	0.273439	6.8873e-132	1.92712e-131	434.226	Macrophages
DDIT3	CXCL8	literature	2	0	0.389977	1.29342e-129	3.5508e-129	426.701	Macrophages
NFKB1	CCL3	literature	0	1	0.302053	2.22131e-129	5.9852e-129	425.947	Macrophages
CEBPB	CCL3	literature	7	0	0.201628	8.67178e-128	2.31513e-127	420.674	Macrophages
USF2	CCL3L1	eY1H	0	0	0.333526	1.1355e-127	3.00391e-127	420.298	Macrophages
NFKB1	CXCL8	literature	7	0	0.381953	4.83517e-126	1.2676e-125	414.899	Macrophages
IRF7	CCL3	literature	1	0	0.202905	6.33803e-124	1.63218e-123	407.89	Macrophages
ATF3	CCL3	literature	0	3	0.325198	1.21562e-123	2.12328e-122	404.189	Neutrophils
BACH1	CXCL8	literature	0	1	0.338361	1.09529e-122	2.79588e-122	403.792	Macrophages
FOS	IL1RN	literature	1	0	0.262565	4.54163e-123	7.43692e-122	402.381	Neutrophils
REL	CCL3	literature	1	0	0.279295	2.97312e-122	7.52329e-122	402.364	Macrophages
HIF1A	CXCL8	literature	1	1	0.274037	5.36382e-119	1.30073e-118	391.608	Macrophages
FOSB	CXCL8	literature	1	0	0.320966	1.69863e-118	4.08515e-118	389.957	Macrophages
RELA	CCL3	literature	2	0	0.311599	1.10179e-115	2.60668e-115	380.64	Macrophages
CEBPD	CXCL8	literature	1	0	0.308318	6.11942e-114	1.43609e-113	374.856	Macrophages
STAT1	TNFSF10	literature	1	0	0.397951	1.02635e-112	8.77529e-111	365.601	CD8 T cells
STAT1	TNFSF13B	literature	0	0	0.258257	1.76127e-111	2.1974e-110	364.276	Neutrophils
NFKB2	CXCL8	literature	0	0	0.414157	1.2222e-110	2.84527e-110	363.904	Macrophages
HIF1A	TNFSF13B	literature	1	0	0.27555	1.08775e-110	1.29541e-109	361.717	Neutrophils
CREB1	TNFSF13B	literature	1	0	0.320914	3.45661e-109	7.92027e-109	359.105	Macrophages
STAT6	CXCL8	literature	0	1	0.347862	6.52304e-108	1.48297e-107	354.878	Macrophages
TGIF1	CCL3	eY1H	0	0	0.275528	9.00571e-107	2.00051e-106	351.124	Macrophages
ATF4	CXCL8	literature	1	0	0.354951	1.01235e-106	2.23178e-106	350.966	Macrophages
IRF2	TNFSF13B	both	1	0	0.319651	4.44548e-107	4.85298e-106	349.846	Neutrophils
AHR	TNFSF13B	literature	1	0	0.307678	2.60729e-106	5.6621e-106	349.623	Macrophages
MAFG	CXCL8	eY1H	0	0	0.421085	5.26677e-105	1.12693e-104	345.308	Macrophages
FOS	CCL2	literature	3	0	0.174433	1.19827e-103	2.5268e-103	340.821	Macrophages
RBPJ	CCL3L1	eY1H	0	0	0.251747	4.86476e-103	1.004e-102	338.831	Macrophages
MAZ	IL1RN	eY1H	0	0	0.299794	9.22764e-103	1.89102e-102	337.918	Macrophages
IRF5	CCL3	literature	1	0	0.278154	2.31547e-102	4.7119e-102	336.6	Macrophages
STAT3	CXCL8	literature	1	0	0.289773	4.88708e-102	9.87598e-102	335.533	Macrophages
KLF6	CCL2	literature	1	0	0.512611	8.16801e-103	4.65576e-101	333.296	CD8 T cells
NR3C1	CXCL8	literature	0	0	0.31316	1.71338e-100	3.41503e-100	330.421	Macrophages
IRF5	CXCL8	literature	1	0	0.363487	1.70322e-99	3.37168e-99	327.117	Macrophages
IRF1	CXCL8	literature	0	0	0.266572	4.6335e-99	9.11046e-99	325.683	Macrophages
NFKB1	CXCL11	literature	0	0	0.333318	1.05456e-98	2.05957e-98	324.507	Macrophages
RELA	CXCL8	literature	27	0	0.378133	3.2185e-97	6.16174e-97	319.604	Macrophages
ATF3	CCL4	both	1	3	0.255533	2.47063e-96	4.69904e-96	316.673	Macrophages
RELB	TNFSF13B	literature	1	0	0.24954	1.20051e-95	2.26849e-95	314.401	Macrophages
YY1	CXCL8	literature	1	0	0.331783	1.60863e-88	3.02007e-88	290.735	Macrophages
REL	CXCL8	both	0	0	0.312063	6.3342e-88	1.18157e-87	288.767	Macrophages
STAT1	TNFSF10	literature	1	0	0.222537	1.95242e-83	1.5501e-82	271.766	Neutrophils
STAT3	CXCL11	literature	1	0	0.255974	1.92061e-80	3.51509e-80	263.941	Macrophages
XBP1	CXCL8	literature	1	0	0.31853	2.73036e-80	4.96585e-80	263.442	Macrophages
IRF2	TNFSF10	both	0	0	0.275077	8.43294e-80	6.31266e-79	259.774	Neutrophils
IRF2	CXCL11	literature	0	0	0.264463	1.12861e-78	2.02732e-78	258.091	Macrophages
REL	CCL4	both	1	0	0.258349	3.60953e-78	6.444e-78	256.422	Macrophages
KLF6	CXCL8	literature	1	0	0.187253	1.81696e-77	3.22399e-77	254.1	Macrophages
CREM	CCL4	literature	0	1	0.235337	5.60786e-77	9.89022e-77	252.482	Macrophages
JUN	CXCL8	literature	11	0	0.20004	9.21066e-76	1.61464e-75	248.453	Macrophages
IRF3	CCL3	literature	1	0	0.344965	1.65716e-75	2.88763e-75	247.615	Macrophages
ATF2	IL1RN	literature	0	0	0.324641	2.10914e-75	3.65334e-75	247.275	Macrophages
ATF3	CCL4L2	eY1H	0	0	0.277459	6.57799e-76	4.78732e-75	246.885	Neutrophils
SMAD4	TNFSF13B	literature	1	0	0.350237	4.70831e-74	8.10721e-74	242.803	Macrophages
JUN	IL1RN	literature	1	0	0.148172	2.98848e-72	5.11557e-72	236.824	Macrophages
CEBPG	CXCL8	literature	1	0	0.355134	3.3092e-72	5.63145e-72	236.685	Macrophages
CEBPB	CXCL8	literature	4	1	0.193654	5.70169e-72	9.64646e-72	235.909	Macrophages
CREB1	CCL3	literature	1	0	0.297423	7.72099e-72	1.29873e-71	235.48	Macrophages
BCL6	CCL4	literature	0	1	0.261023	8.27632e-70	1.37623e-69	228.752	Macrophages
NFKB1	TNFSF10	literature	1	0	0.208682	5.08983e-69	8.41558e-69	226.14	Macrophages
KLF6	CCL2	literature	1	0	0.12675	1.88847e-64	3.10477e-64	210.969	Macrophages
FOS	CXCL8	literature	6	0	0.180953	6.76254e-64	1.10556e-63	209.137	Macrophages
IRF1	CXCL11	literature	0	0	0.21699	2.7912e-63	4.53764e-63	207.1	Macrophages
NFKB1	TNFSF13B	literature	0	0	0.272369	1.48263e-63	8.26485e-63	206.234	Neutrophils
ATF3	CCL4	both	1	3	0.258927	2.40361e-63	1.31197e-62	205.568	Neutrophils
RELA	TNFSF13B	literature	1	0	0.301583	3.46117e-63	1.85067e-62	205.071	Neutrophils
KLF6	CCL2	literature	1	0	0.567933	1.37023e-64	2.08274e-62	204.901	Plasma cells
DDIT3	CXCL8	literature	2	0	0.382025	4.44224e-63	2.32773e-62	204.741	Neutrophils
RELA	CXCL11	literature	1	0	0.28623	2.05545e-61	3.32298e-61	200.905	Macrophages
ZDHHC7	CCL3L1	eY1H	0	0	0.328	2.24113e-61	3.60315e-61	200.788	Macrophages
RELA	IL1RN	literature	1	0	0.290896	1.04866e-60	5.08795e-60	196.969	Neutrophils
IRF2	TNFSF10	both	0	0	0.366525	1.22633e-60	1.39802e-59	195.51	CD8 T cells
ATF7	CCL3	literature	0	1	0.327449	2.07508e-59	3.31785e-59	194.264	Macrophages
ETS2	CXCL8	literature	1	0	0.363547	4.64852e-59	2.09985e-58	191.602	Neutrophils
NFE2L2	CXCL8	literature	1	0	0.28686	9.72398e-58	4.3181e-57	187.24	Neutrophils
REL	CCL3	literature	1	0	0.27193	1.42613e-57	6.22744e-57	186.711	Neutrophils
RELA	CCL4	literature	1	0	0.253153	6.60808e-56	1.05079e-55	182.635	Macrophages
REL	CCL4L2	eY1H	0	0	0.284111	1.34344e-55	5.67712e-55	180.201	Neutrophils
BCL6	CXCL11	literature	0	1	0.26339	3.1178e-54	4.93087e-54	177.082	Macrophages
IRF1	TNFSF10	literature	3	0	0.140553	5.79919e-54	9.12198e-54	176.195	Macrophages
NFKB1	IL1RN	literature	0	0	0.247517	2.74495e-54	1.12371e-53	175.894	Neutrophils
IRF1	TNFSF10	literature	3	0	0.300037	4.6679e-54	3.62823e-53	174.203	CD8 T cells
REL	CXCL8	both	0	0	0.335692	1.85066e-50	7.2369e-50	163.241	Neutrophils
MEF2A	IL1RN	literature	0	0	0.247633	2.23869e-48	8.62554e-48	156.344	Neutrophils
NFKB2	TNFSF13B	literature	0	0	0.209364	6.7755e-48	1.06004e-47	156.047	Macrophages
NFKB1	CXCL8	literature	7	0	0.314921	2.33812e-47	8.75126e-47	153.001	Neutrophils
STAT3	IL1RN	literature	1	0	0.199706	5.66243e-47	2.03227e-46	151.786	Neutrophils
FOS	CCL2	literature	3	0	0.427467	9.62822e-47	6.33241e-46	150.146	CD8 T cells
MITF	CXCL8	literature	0	1	0.285719	7.16402e-46	1.1089e-45	149.338	Macrophages
CEBPB	CCL2	literature	6	0	0.406715	3.78462e-45	2.31132e-44	144.956	CD8 T cells
KLF3	TNFSF10	eY1H	0	0	0.163444	4.56817e-44	7.03353e-44	143.351	Macrophages
IRF8	TNFSF13B	literature	0	1	0.241239	2.13358e-44	7.4533e-44	143.267	Neutrophils
YY1	CCL4	literature	1	0	0.206617	5.80554e-44	8.89165e-44	143.012	Macrophages
IRF5	TNFSF10	literature	1	0	0.167331	6.31932e-44	9.62786e-44	142.898	Macrophages
IRF7	CXCL10	literature	3	0	0.157971	9.02496e-44	3.07083e-43	141.224	Neutrophils
JUN	CXCL8	literature	11	0	0.222321	1.99858e-43	6.6282e-43	140.114	Neutrophils
CEBPB	CCL4	literature	4	1	0.137054	5.59649e-43	8.48219e-43	139.758	Macrophages
IRF7	TNFSF10	literature	1	0	0.443427	2.97467e-42	1.13038e-40	132.7	Plasma cells
STAT6	IL1RN	literature	0	0	0.222973	3.58283e-41	1.14476e-40	132.682	Neutrophils
IRF7	CCL2	literature	1	0	0.111694	1.61332e-40	2.40757e-40	131.61	Macrophages
RUNX1	TNFSF10	literature	1	0	0.137588	8.23161e-40	1.22214e-39	129.266	Macrophages
STAT1	TNFSF10	literature	1	0	0.363326	2.37021e-41	2.2754e-39	128.369	CD4 T cells
XBP1	CCL2	literature	1	0	-0.535841	7.79097e-40	2.36846e-38	124.989	Plasma cells
CEBPB	CCL4	literature	4	1	0.302441	3.09371e-38	1.6532e-37	122.186	CD8 T cells
STAT1	CXCL11	literature	0	0	0.185574	1.04875e-37	3.08734e-37	121.285	Neutrophils
CREB1	TNFSF13B	literature	1	0	0.32849	2.23364e-37	6.43091e-37	120.226	Neutrophils
HIF1A	CXCL8	literature	1	1	0.218359	2.26269e-37	6.44374e-37	120.223	Neutrophils
CREB1	CCL4	literature	1	0	0.251487	9.42454e-37	1.39215e-36	119.112	Macrophages
REL	CCL4	both	1	0	0.236269	6.71339e-37	1.87118e-36	118.685	Neutrophils
RELB	TNFSF13B	literature	1	0	0.216038	7.70187e-37	2.12409e-36	118.503	Neutrophils
KLF3	IL1RN	eY1H	0	0	0.224903	2.47772e-36	6.62411e-36	116.862	Neutrophils
AHR	TNFSF13B	literature	1	0	0.304991	2.91475e-36	7.71377e-36	116.642	Neutrophils
NR3C1	CXCL8	literature	0	0	0.268899	5.58645e-36	1.44916e-35	115.732	Neutrophils
CEBPB	CCL3	literature	7	0	0.384023	3.56706e-36	1.74276e-35	115.466	CD8 T cells
ATF4	CXCL8	literature	1	0	0.300164	4.00429e-35	1.01857e-34	112.919	Neutrophils
NFKB1	TNFSF10	literature	1	0	0.202098	4.48186e-35	1.12908e-34	112.77	Neutrophils
STAT3	CXCL8	literature	1	0	0.242586	8.25417e-35	2.05961e-34	111.903	Neutrophils
IRF2	CXCL10	literature	1	0	0.127115	5.05447e-34	7.42853e-34	110.052	Macrophages
IRF2	CXCL11	literature	0	0	0.219072	1.39969e-33	3.3644e-33	107.873	Neutrophils
NFKB2	TNFSF13B	literature	0	0	0.247633	2.84223e-33	6.76968e-33	106.865	Neutrophils
NFKB1	CXCL11	literature	0	0	0.231661	1.46713e-32	3.43204e-32	104.523	Neutrophils
STAT1	TNFSF10	literature	1	0	0.399417	2.30186e-33	3.88759e-32	104.343	Plasma cells
STAT2	CCL2	literature	0	0	0.108255	1.09706e-31	1.60424e-31	102.298	Macrophages
BCL6	CCL3	literature	0	1	0.207578	8.08567e-32	1.84213e-31	102.098	Neutrophils
ETV6	CCL7	literature	0	0	0.155882	1.87871e-31	2.73352e-31	101.529	Macrophages
STAT1	TNFSF10	literature	1	0	0.379496	4.32395e-33	2.88263e-31	101.452	Secretory epithelial cells
KLF4	TNFSF10	eY1H	0	0	0.121772	3.81028e-31	5.51638e-31	100.516	Macrophages
STAT6	CXCL8	literature	0	1	0.278157	2.79797e-31	6.31954e-31	100.32	Neutrophils
BACH1	CXCL8	literature	0	1	0.233971	4.19594e-31	9.39604e-31	99.7477	Neutrophils
NFKB2	CXCL8	literature	0	0	0.316098	6.90764e-31	1.53373e-30	99.0408	Neutrophils
JUND	CXCL8	literature	1	0	0.202062	7.48529e-31	1.63429e-30	98.9492	Neutrophils
JUN	CCL4	literature	0	0	0.113432	7.76598e-29	1.11876e-28	92.8521	Macrophages
IRF5	CCL2	literature	1	0	0.146198	8.87097e-29	1.27165e-28	92.6673	Macrophages
MAFB	CCL2	literature	1	0	0.125492	2.18678e-28	4.62046e-28	90.8059	Neutrophils
SP1	TNFSF10	literature	0	1	0.175112	3.40596e-28	4.85851e-28	90.7335	Macrophages
RELA	CXCL8	literature	27	0	0.276465	4.35915e-28	9.13678e-28	89.8223	Neutrophils
CEBPD	CXCL8	literature	1	0	0.216483	7.59616e-28	1.57952e-27	89.0326	Neutrophils
RUNX1	CCL3	literature	2	0	0.177325	8.5195e-28	1.75757e-27	88.8785	Neutrophils
STAT1	CCL2	literature	1	0	0.495853	5.42705e-29	1.80902e-27	88.8369	Secretory epithelial cells
CEBPB	CCL2	literature	6	0	0.50202	1.4077e-28	4.02201e-27	87.6841	Secretory epithelial cells
REL	TNFSF10	literature	1	0	0.118941	3.59081e-27	5.0972e-27	87.3424	Macrophages
NFKB1	CCL3	literature	0	1	0.180538	2.93412e-27	6.00577e-27	87.1057	Neutrophils
HHEX	TNFSF10	eY1H	0	0	0.214061	4.48746e-27	6.33908e-27	87.0278	Macrophages
NFKB1	TNFSF10	literature	1	0	0.301521	1.47038e-26	5.98657e-26	83.7884	CD8 T cells
IRF1	TNFSF13B	literature	2	0	0.13604	5.36361e-26	1.08097e-25	82.9359	Neutrophils
BCL6	CCL7	literature	0	2	0.158665	8.47741e-26	1.19175e-25	82.7951	Macrophages
RELA	CXCL11	literature	1	0	0.23057	7.88555e-26	1.57711e-25	82.3909	Neutrophils
IRF1	CXCL8	literature	0	0	0.185259	1.55565e-25	3.06452e-25	81.4325	Neutrophils
MAX	CCL2	literature	1	0	0.130016	3.64129e-25	5.09431e-25	80.6993	Macrophages
JUN	CCL4	literature	0	0	0.217549	3.11548e-25	1.15814e-24	79.5145	CD8 T cells
CEBPB	CXCL8	literature	4	1	0.161764	8.21369e-25	1.60596e-24	79.0428	Neutrophils
IRF7	TNFSF10	literature	1	0	0.343504	2.98495e-25	7.46237e-24	76.8266	Secretory epithelial cells
SP1	TNFSF10	literature	0	1	0.264789	4.40051e-24	8.47745e-24	76.6426	Neutrophils
KLF6	CCL2	literature	1	0	0.428208	7.22091e-25	1.44418e-23	75.8741	Secretory epithelial cells
FOSB	CXCL8	literature	1	0	0.208009	8.2148e-24	1.57101e-23	75.7527	Neutrophils
BCL6	CXCL11	literature	0	1	0.214332	9.69445e-24	1.84054e-23	75.5242	Neutrophils
CEBPB	CCL3	literature	7	0	0.119343	1.60901e-23	3.03281e-23	74.8037	Neutrophils
NFATC2	TNFSF10	literature	1	0	0.2466	1.05535e-23	3.68295e-23	74.5235	CD8 T cells
KLF6	CXCL8	literature	1	0	0.144888	2.19215e-23	4.10246e-23	74.3679	Neutrophils
IRF2	TNFSF10	both	0	0	0.439894	5.41939e-24	7.48862e-23	73.4996	Plasma cells
KLF3	TNFSF10	eY1H	0	0	0.180163	5.14765e-23	9.56514e-23	73.1466	Neutrophils
IRF1	TNFSF10	literature	3	0	0.365267	8.43331e-24	1.06822e-22	72.9872	Plasma cells
NR4A2	CCL3	literature	0	1	0.171732	1.36503e-22	1.88258e-22	72.1697	Macrophages
USF2	CCL3L1	eY1H	0	0	0.204239	1.09007e-22	1.9972e-22	72.0844	Neutrophils
RELA	CCL3	literature	2	0	0.184294	1.33741e-22	2.43335e-22	71.7995	Neutrophils
MEF2A	IL1RN	literature	0	0	0.492542	1.60754e-23	2.47314e-22	71.7761	Secretory epithelial cells
KLF4	TNFSF10	eY1H	0	0	0.142425	1.44168e-22	2.60497e-22	71.7012	Neutrophils
ATF2	IL1RN	literature	0	0	0.280363	3.12061e-22	5.59999e-22	70.597	Neutrophils
MAZ	IL1RN	eY1H	0	0	0.246318	3.85228e-22	6.86597e-22	70.303	Neutrophils
STAT1	CCL3	literature	1	0	0.11643	3.92491e-22	6.94815e-22	70.2858	Neutrophils
STAT3	CXCL11	literature	1	0	0.16966	5.60302e-22	9.85229e-22	69.782	Neutrophils
FOS	CCL2	literature	3	0	0.379858	1.40571e-22	1.5262e-21	69.1505	Plasma cells
XBP1	CXCL8	literature	1	0	0.23923	1.26018e-21	2.20111e-21	68.6223	Neutrophils
IRF5	CXCL8	literature	1	0	0.266089	3.33562e-21	5.78763e-21	67.2275	Neutrophils
STAT6	CCL7	literature	0	0	0.135954	4.81194e-21	6.54334e-21	67.0505	Macrophages
RXRA	TNFSF10	literature	0	0	0.135156	6.90725e-21	9.34889e-21	66.5357	Macrophages
IRF3	TNFSF10	literature	1	0	0.155798	1.09914e-20	1.48079e-20	65.8722	Macrophages
IRF5	TNFSF10	literature	1	0	0.182227	2.25069e-20	3.87947e-20	64.4827	Neutrophils
RUNX1	TNFSF10	literature	1	0	0.145102	3.43103e-20	5.87535e-20	63.8839	Neutrophils
IRF8	TNFSF10	eY1H	0	0	0.10668	4.44127e-20	5.9558e-20	63.8643	Macrophages
REL	TNFSF10	literature	1	0	0.274059	2.884e-20	8.96662e-20	63.274	CD8 T cells
IRF7	CCL3	literature	1	0	0.107748	5.2753e-20	8.97486e-20	63.2727	Neutrophils
STAT1	CXCL10	literature	5	0	0.106252	8.58834e-20	1.45171e-19	62.5789	Neutrophils
REL	TNFSF13B	literature	2	0	0.151068	1.07004e-19	1.79712e-19	62.2709	Neutrophils
NFIL3	TNFSF10	literature	0	1	0.226753	1.3958e-19	2.3293e-19	61.8967	Neutrophils
JUN	CCL4	literature	0	0	0.124985	1.61741e-19	2.68203e-19	61.6933	Neutrophils
STAT6	IL1RN	literature	0	0	0.356791	4.74764e-20	6.33018e-19	60.4544	Secretory epithelial cells
BCL6	CCL4	literature	0	1	0.172481	4.73834e-19	7.80784e-19	60.1517	Neutrophils
CREM	CCL4	literature	0	1	0.150768	1.54503e-18	2.51428e-18	58.4646	Neutrophils
STAT6	CCL2	literature	0	0	0.105113	3.82354e-18	5.05751e-18	57.4563	Macrophages
SP3	CCL2	literature	1	0	0.145061	4.27479e-18	5.6288e-18	57.3019	Macrophages
RBPJ	CCL3L1	eY1H	0	0	0.138937	5.10199e-18	8.25137e-18	56.7501	Neutrophils
NR4A2	CCL4	literature	0	1	0.174726	8.34608e-18	1.08911e-17	56.3496	Macrophages
YY1	CXCL8	literature	1	0	0.219661	1.02488e-17	1.64735e-17	55.7526	Neutrophils
KLF6	CCL2	literature	1	0	0.444199	1.07418e-18	1.6972e-17	55.7096	Cilliated epithelial cells
KLF6	CCL2	literature	1	0	0.359187	9.06924e-19	1.95764e-17	55.5037	CD4 T cells
IRF7	TNFSF10	literature	1	0	0.241667	1.0196e-18	1.95764e-17	55.5037	CD4 T cells
IRF4	TNFSF10	literature	0	1	0.271117	6.89421e-18	1.99815e-17	55.4741	CD8 T cells
CEBPB	CCL2	literature	6	0	0.372251	3.06048e-18	2.44839e-17	55.1809	Plasma cells
IRF3	TNFSF10	literature	1	0	0.244523	1.02676e-17	2.92627e-17	54.9237	CD8 T cells
RELA	CXCL10	literature	4	0	0.111179	2.60551e-17	3.38484e-17	54.7137	Macrophages
BCL6	CCL2	literature	0	2	0.108177	3.51194e-17	4.522e-17	54.2958	Macrophages
SPI1	CCL2	literature	1	0	0.404487	6.33642e-18	4.81568e-17	54.205	Plasma cells
ETS2	CXCL8	literature	1	0	0.321698	5.88091e-18	6.53434e-17	53.7647	Secretory epithelial cells
RELA	IL1RN	literature	1	0	0.38594	6.27063e-18	6.60066e-17	53.7502	Secretory epithelial cells
NFATC3	TNFSF10	literature	1	0	0.242073	4.1959e-17	1.15726e-16	52.9401	CD8 T cells
NFKB1	IL1RN	literature	0	0	0.413839	3.08159e-17	3.08159e-16	51.5272	Secretory epithelial cells
CREB1	CCL3	literature	1	0	0.228272	2.53633e-16	4.02738e-16	51.141	Neutrophils
MAFB	CCL2	literature	1	0	0.495306	6.08529e-17	5.79551e-16	50.6159	Secretory epithelial cells
STAT2	CCL2	literature	0	0	0.429047	7.7324e-17	7.02946e-16	50.3374	Secretory epithelial cells
IRF7	CCL2	literature	1	0	0.395929	8.41016e-17	7.31318e-16	50.2804	Secretory epithelial cells
REL	CCL2	literature	2	0	-0.141702	6.8299e-16	1.07797e-15	49.7206	Neutrophils
IRF1	CCL5	literature	4	0	0.443743	5.30896e-16	3.66801e-15	47.9539	Plasma cells
CREM	CCL4	literature	0	1	0.485966	3.58969e-17	3.69738e-15	47.9424	NK cells
STAT6	CCL8	literature	0	0	0.101078	3.97273e-15	5.04832e-15	47.4931	Macrophages
BCL6	CCL8	literature	0	1	0.108112	4.01042e-15	5.07405e-15	47.4858	Macrophages
CEBPB	CCL8	literature	0	1	0.293622	3.15873e-15	8.30989e-15	46.7741	CD8 T cells
IRF2	TNFSF10	both	0	0	0.321971	1.49304e-15	1.2442e-14	46.1918	Secretory epithelial cells
STAT2	CCL2	literature	0	0	0.255737	5.21223e-15	1.33028e-14	46.0953	CD8 T cells
IRF3	CCL2	literature	1	0	0.154505	1.22482e-14	1.52971e-14	45.8937	Macrophages
FOS	CXCL8	literature	6	0	0.119792	1.1032e-14	1.71029e-14	45.7328	Neutrophils
ATF3	CCL4	both	1	3	0.322477	7.55281e-15	1.87178e-14	45.6026	CD8 T cells
IRF2	CCL5	literature	0	1	0.516065	3.82738e-15	2.5294e-14	45.1682	Plasma cells
CEBPB	CCL4	literature	4	1	0.101747	1.95927e-14	3.01959e-14	44.9126	Neutrophils
KLF6	CXCL8	literature	1	0	0.250422	5.41094e-15	4.0081e-14	44.5041	Secretory epithelial cells
IRF8	TNFSF10	eY1H	0	0	0.133332	2.66902e-14	4.08938e-14	44.4751	Neutrophils
TBX21	CCL4	literature	0	0	0.232159	1.99703e-14	4.87846e-14	44.2206	CD8 T cells
NFIL3	TNFSF10	literature	0	1	0.130808	4.06749e-14	5.05829e-14	44.1683	Macrophages
CEBPB	CCL2	literature	6	0	0.429734	4.30059e-15	5.22687e-14	44.121	Cilliated epithelial cells
ZNF524	CCL8	eY1H	0	0	0.132837	4.60912e-14	5.70746e-14	43.9941	Macrophages
STAT3	CCL5	literature	1	0	0.483146	9.74198e-15	6.16992e-14	43.8817	Plasma cells
STAT1	CXCL10	literature	5	0	0.411966	8.70762e-15	6.21973e-14	43.8701	Secretory epithelial cells
NFATC3	TNFSF10	literature	1	0	0.141501	5.67613e-14	6.99896e-14	43.6999	Macrophages
MAFB	CCL2	literature	1	0	0.309423	3.35107e-14	7.9588e-14	43.5144	CD8 T cells
JUNB	CCL2	literature	0	0	0.304657	1.59124e-14	9.67471e-14	43.2328	Plasma cells
TGIF1	CCL3	eY1H	0	0	0.138495	1.67451e-13	2.55071e-13	41.8342	Neutrophils
RELA	CCL4	literature	1	0	0.15241	1.82426e-13	2.76275e-13	41.719	Neutrophils
SPI1	TNFSF10	literature	1	0	0.28509	1.22164e-13	2.82297e-13	41.6878	CD8 T cells
IRF7	CCL3	literature	1	0	0.205176	1.32436e-13	3.01955e-13	41.5907	CD8 T cells
KLF3	IL1RN	eY1H	0	0	0.29225	5.45382e-14	3.40864e-13	41.4159	Secretory epithelial cells
MAZ	TNFSF10	eY1H	0	0	0.103245	3.70082e-13	4.52495e-13	41.0072	Macrophages
HIF1A	CCL2	literature	2	0	0.434813	7.81916e-14	4.66956e-13	40.9618	Secretory epithelial cells
IRF7	CCL5	literature	2	0	0.382206	8.58162e-14	4.83114e-13	40.9127	Plasma cells
MAX	IL32	eY1H	0	0	0.420161	1.05519e-13	5.72819e-13	40.667	Plasma cells
IRF1	CXCL11	literature	0	0	0.11753	4.45285e-13	6.70487e-13	40.4399	Neutrophils
ZDHHC7	CCL2	eY1H	0	0	0.124438	6.23065e-13	7.58627e-13	40.2617	Macrophages
SP1	CCL2	literature	3	1	0.128766	7.84137e-13	9.50766e-13	39.936	Macrophages
STAT3	IL1RN	literature	1	0	0.27651	1.95751e-13	1.11858e-12	39.7015	Secretory epithelial cells
RELB	IL32	literature	0	0	0.482197	2.4682e-13	1.37122e-12	39.4077	Secretory epithelial cells
NFKB2	IL32	literature	0	0	0.478255	3.14673e-13	1.70093e-12	39.0968	Secretory epithelial cells
IRF7	TNFSF10	literature	1	0	0.294466	8.2855e-14	2.84469e-12	38.3549	NK cells
JUN	CCL2	literature	6	0	0.199251	1.40824e-12	3.1274e-12	38.2182	CD8 T cells
ZBTB7A	IL32	eY1H	0	0	0.446743	6.26923e-13	3.21499e-12	38.1783	Secretory epithelial cells
MAX	IL32	eY1H	0	0	0.446581	8.03355e-13	3.9188e-12	37.8927	Secretory epithelial cells
RXRA	TNFSF10	literature	0	0	0.156709	3.1038e-12	4.59432e-12	37.6633	Neutrophils
STAT5B	TNFSF10	literature	1	0	0.283061	2.69496e-12	5.8334e-12	37.3188	CD8 T cells
ZDHHC5	CCL8	eY1H	0	0	0.13829	5.4166e-12	6.51335e-12	37.1597	Macrophages
IRF5	CCL3	literature	1	0	0.142946	6.129e-12	9.02134e-12	36.6898	Neutrophils
NR4A2	CCL3	literature	0	1	0.170397	6.95119e-12	1.01744e-11	36.5163	Neutrophils
SPI1	CCL2	literature	1	0	0.277854	5.65801e-12	1.2094e-11	36.2669	CD8 T cells
ZDHHC7	CCL8	eY1H	0	0	0.123995	1.02024e-11	1.22177e-11	36.2522	Macrophages
NR4A1	CCL3	literature	0	1	0.174611	8.77556e-12	1.27733e-11	36.1881	Neutrophils
IRF7	CXCL10	literature	3	0	0.383639	2.83803e-12	1.29001e-11	36.1738	Secretory epithelial cells
REL	CCL4	both	1	0	0.220381	6.83725e-12	1.44342e-11	36.0117	CD8 T cells
SP4	TNFSF10	eY1H	0	0	0.291168	9.75608e-12	2.0345e-11	35.5165	CD8 T cells
ZDHHC7	IL32	eY1H	0	0	0.468287	5.07679e-12	2.25635e-11	35.3672	Secretory epithelial cells
ETS1	CCL5	both	1	0	0.464227	9.24217e-12	4.6827e-11	34.3139	Plasma cells
ZNF622	CCL8	eY1H	0	0	0.125801	4.57594e-11	5.39109e-11	34.1106	Macrophages
REL	CCL4L2	eY1H	0	0	0.26762	2.99487e-11	6.17014e-11	33.9159	CD8 T cells
PREB	CCL2	literature	1	0	0.12782	5.9478e-11	6.97907e-11	33.7382	Macrophages
ATF4	CXCL8	literature	1	0	0.234252	1.85184e-11	7.40735e-11	33.6523	Secretory epithelial cells
JUND	CCL5	literature	1	0	0.455969	1.86948e-11	9.16647e-11	33.3448	Plasma cells
STAT3	CCL2	literature	2	0	0.344238	2.59389e-11	9.97651e-11	33.2227	Secretory epithelial cells
ELF2	CCL2	eY1H	0	0	0.110272	9.99058e-11	1.16757e-10	32.9958	Macrophages
ATF2	CCL2	literature	2	0	0.131298	1.47222e-10	1.69334e-10	32.4594	Macrophages
NFKB1	CCL3	literature	0	1	0.258939	1.00306e-10	2.01793e-10	32.2064	CD8 T cells
HIF1A	CCL2	literature	2	0	0.19561	1.20747e-10	2.4009e-10	31.9557	CD8 T cells
NFKB1	IL32	literature	1	0	0.382179	5.39748e-11	2.5638e-10	31.861	Plasma cells
FOXO3	TNFSF10	literature	1	0	0.111058	3.10296e-10	3.55497e-10	31.3894	Macrophages
CEBPB	CCL8	literature	0	1	0.404928	1.09775e-10	3.99181e-10	31.2222	Secretory epithelial cells
NR3C1	CCL2	literature	0	0	0.42346	1.23854e-10	4.42334e-10	31.0741	Secretory epithelial cells
CREM	CCL4	literature	0	1	0.166806	3.02011e-10	5.80269e-10	30.6826	CD8 T cells
MAX	CCL2	literature	1	0	0.374199	2.11875e-10	7.30604e-10	30.3502	Secretory epithelial cells
IRF1	CXCL8	literature	0	0	0.232037	2.28292e-10	7.73872e-10	30.2672	Secretory epithelial cells
NFKB2	IL32	literature	0	0	0.400714	2.32577e-10	1.01005e-09	29.8829	Plasma cells
KLF2	IL32	eY1H	0	0	0.334258	2.40626e-10	1.01598e-09	29.8745	Plasma cells
STAT1	CCL2	literature	1	0	0.236526	2.71778e-10	1.11649e-09	29.7384	Plasma cells
REL	CXCL10	both	1	0	-0.102549	9.94924e-10	1.42443e-09	29.387	Neutrophils
HIF1A	CXCL8	literature	1	1	0.408139	5.88977e-10	2.2955e-09	28.6985	Plasma cells
ATF4	CCL2	literature	1	0	0.304626	7.32007e-10	2.40002e-09	28.6343	Secretory epithelial cells
JUNB	CCL2	literature	0	0	0.179258	1.93164e-09	3.67011e-09	28.0215	CD8 T cells
IRF7	CXCL10	literature	3	0	0.388049	8.59723e-10	3.88104e-09	27.9409	Cilliated epithelial cells
MAFB	CCL2	literature	1	0	0.438167	9.54645e-10	4.18983e-09	27.8305	Cilliated epithelial cells
REL	TNFSF10	literature	1	0	0.267754	1.31767e-09	4.25056e-09	27.8097	Secretory epithelial cells
STAT6	CCL2	literature	0	0	0.336155	1.42581e-09	4.45567e-09	27.7417	Secretory epithelial cells
NR4A3	CCL3	literature	0	1	0.160542	4.60409e-09	6.48533e-09	27.2002	Neutrophils
RELA	CCL4	literature	1	0	0.197941	3.66729e-09	6.81637e-09	27.1283	CD8 T cells
NFKB1	CCL2	literature	3	1	0.394236	2.26948e-09	6.98301e-09	27.0935	Secretory epithelial cells
NR4A2	CCL4	literature	0	1	0.159583	7.72912e-09	1.0829e-08	26.4605	Neutrophils
NFKB2	CXCL8	literature	0	0	0.298513	3.89877e-09	1.18145e-08	26.3349	Secretory epithelial cells
IRF3	TNFSF10	literature	1	0	0.341718	3.166e-09	1.20308e-08	26.3087	Plasma cells
MAFK	CXCL8	literature	1	0	0.258381	4.38836e-09	1.30996e-08	26.1859	Secretory epithelial cells
MAZ	TNFSF10	eY1H	0	0	0.160342	7.79409e-09	1.41786e-08	26.0717	CD8 T cells
MAZ	TNFSF10	eY1H	0	0	0.362271	3.8846e-09	1.44015e-08	26.0492	Plasma cells
IRF1	TNFSF10	literature	3	0	0.18983	1.52762e-09	1.62946e-08	25.871	CD4 T cells
SMAD3	IL32	eY1H	0	0	0.375491	6.54907e-09	1.9262e-08	25.6297	Secretory epithelial cells
STAT1	CCL2	literature	1	0	0.312766	5.44506e-09	2.1508e-08	25.4706	Cilliated epithelial cells
STAT2	CCL2	literature	0	0	0.258669	6.23116e-09	2.20264e-08	25.4362	Plasma cells
SP3	CCL2	literature	1	0	0.386363	8.21342e-09	2.3807e-08	25.324	Secretory epithelial cells
REL	CCL2	literature	2	0	0.369794	9.87193e-09	2.82055e-08	25.0794	Secretory epithelial cells
JUN	CXCL10	literature	0	0	0.176532	1.59943e-08	2.84898e-08	25.065	CD8 T cells
REL	CCL3	literature	1	0	0.242438	1.68099e-08	2.96339e-08	25.0082	CD8 T cells
NFAT5	CCL2	literature	1	0	0.105283	2.87211e-08	3.21455e-08	24.8908	Macrophages
REL	CCL4	both	1	0	0.382608	2.71724e-09	3.49845e-08	24.7687	NK cells
THRB	IL32	eY1H	0	0	0.401762	1.31837e-08	3.66615e-08	24.7012	Secretory epithelial cells
CREB1	CCL4	literature	1	0	0.168899	3.35601e-08	4.65224e-08	24.3575	Neutrophils
HIF1A	CCL2	literature	2	0	0.254424	1.42263e-08	4.91453e-08	24.2784	Plasma cells
RELB	IL32	literature	0	0	0.299105	1.69232e-08	5.71627e-08	24.0603	Plasma cells
SP1	CCL2	literature	3	1	0.372909	2.13277e-08	5.84322e-08	24.0287	Secretory epithelial cells
RELA	IL32	literature	1	0	0.360299	2.30665e-08	6.2342e-08	23.9352	Secretory epithelial cells
IRF1	CCL2	literature	0	0	0.323171	1.89127e-08	6.9493e-08	23.7786	Cilliated epithelial cells
NFKB1	CXCL8	literature	7	0	0.265894	2.60798e-08	6.95461e-08	23.7775	Secretory epithelial cells
IRF7	TNFSF10	literature	1	0	0.347592	3.12271e-10	7.40083e-08	23.6877	Myeloid DCs
IRF1	CCL2	literature	0	0	0.279353	3.0545e-08	8.03817e-08	23.5686	Secretory epithelial cells
RELA	IL32	literature	1	0	0.355067	2.49848e-08	8.25583e-08	23.53	Plasma cells
RELB	CCL5	literature	0	0	0.404226	2.89471e-08	9.36163e-08	23.3487	Plasma cells
STAT1	CCL5	literature	1	0	0.294009	3.02128e-08	9.5674e-08	23.3173	Plasma cells
STAT1	CXCL10	literature	5	0	0.32321	4.17497e-08	1.34621e-07	22.8246	Cilliated epithelial cells
FOS	CCL2	literature	3	0	0.322076	4.95469e-08	1.53498e-07	22.6353	Cilliated epithelial cells
ETV6	CCL2	literature	0	0	0.307933	6.07316e-08	1.57744e-07	22.5959	Secretory epithelial cells
NFKB1	TNFSF10	literature	1	0	0.251271	6.35927e-08	1.63058e-07	22.5481	Secretory epithelial cells
RUNX1	TNFSF10	literature	1	0	0.221162	1.03393e-07	1.75052e-07	22.4457	CD8 T cells
MAZ	TNFSF10	eY1H	0	0	0.138747	1.28773e-07	1.77572e-07	22.4251	Neutrophils
ATF2	IL1RN	literature	0	0	0.341947	8.0774e-08	2.04491e-07	22.2215	Secretory epithelial cells
MAZ	IL32	eY1H	0	0	0.374811	7.27075e-08	2.21031e-07	22.1092	Plasma cells
NFATC3	TNFSF10	literature	1	0	0.290203	1.25589e-07	3.10097e-07	21.6208	Secretory epithelial cells
FOS	CCL2	literature	3	0	0.274811	5.19293e-08	3.67839e-07	21.3744	CD4 T cells
SP1	TNFSF10	literature	0	1	0.238628	1.54972e-07	3.7798e-07	21.3352	Secretory epithelial cells
KLF6	CXCL8	literature	1	0	0.300483	1.2983e-07	3.86945e-07	21.3014	Plasma cells
STAT3	CCL2	literature	2	0	0.165905	2.45053e-07	4.10824e-07	21.215	CD8 T cells
JUN	IL32	literature	1	0	0.218336	1.5129e-07	4.42233e-07	21.1087	Plasma cells
IRF1	TNFSF10	literature	3	0	0.181293	1.97935e-07	4.76952e-07	20.9997	Secretory epithelial cells
IRF7	CCL2	literature	1	0	0.301703	1.62161e-07	4.83423e-07	20.9802	Cilliated epithelial cells
BACH1	CXCL8	literature	0	1	0.271244	2.10047e-07	5.00113e-07	20.9312	Secretory epithelial cells
BCL6	CCL2	literature	0	2	0.325382	2.12667e-07	5.00393e-07	20.9304	Secretory epithelial cells
STAT1	CCL2	literature	1	0	0.136452	3.51106e-07	5.82903e-07	20.7102	CD8 T cells
KLF3	TNFSF10	eY1H	0	0	0.187498	2.73285e-07	6.35546e-07	20.5855	Secretory epithelial cells
MAZ	IL1RN	eY1H	0	0	0.263878	3.02175e-07	6.88248e-07	20.4706	Secretory epithelial cells
ELF2	CCL2	eY1H	0	0	0.345836	4.62702e-07	1.03978e-06	19.8753	Secretory epithelial cells
IRF1	CXCL10	literature	3	0	0.319661	3.75549e-07	1.041e-06	19.8736	Cilliated epithelial cells
CEBPB	CXCL8	literature	4	1	0.177496	5.31728e-07	1.18162e-06	19.6908	Secretory epithelial cells
NFKB1	IL32	literature	1	0	0.351479	5.76712e-07	1.2675e-06	19.5896	Secretory epithelial cells
IRF1	CCL2	literature	0	0	0.204952	4.91384e-07	1.40925e-06	19.4366	Plasma cells
TBX21	CCL4	literature	0	0	0.32194	1.31249e-07	1.50207e-06	19.3446	NK cells
ELF3	CCL2	eY1H	0	0	-0.260438	6.49645e-07	1.68269e-06	19.1808	Cilliated epithelial cells
YY1	CCL4	literature	1	0	0.141407	1.0893e-06	1.75727e-06	19.1182	CD8 T cells
JUN	CCL2	literature	6	0	0.19923	6.33563e-07	1.78336e-06	19.097	Plasma cells
NFIL3	TNFSF10	literature	0	1	0.325361	8.56977e-07	1.82336e-06	19.065	Secretory epithelial cells
STAT1	TNFSF10	literature	1	0	0.22816	2.18255e-07	2.04366e-06	18.9004	NK cells
REL	CCL3	literature	1	0	0.437566	2.40761e-07	2.06653e-06	18.8844	NK cells
MAFB	CCL2	literature	1	0	0.249482	7.6183e-07	2.10542e-06	18.8575	Plasma cells
CEBPB	CCL3	literature	7	0	0.249253	8.62327e-07	2.3406e-06	18.7047	Plasma cells
PLAGL1	CCL4	eY1H	0	0	0.145004	1.80599e-06	2.44844e-06	18.6397	Neutrophils
FOS	IL1RN	literature	1	0	0.223783	1.0336e-06	2.75626e-06	18.4689	Plasma cells
NFIC	IL32	eY1H	0	0	0.29024	1.34037e-06	2.82183e-06	18.4349	Secretory epithelial cells
NFAT5	CCL2	literature	1	0	0.320476	1.50807e-06	3.07769e-06	18.3097	Secretory epithelial cells
ZDHHC7	CXCL8	eY1H	0	0	0.224062	1.53673e-06	3.10451e-06	18.2972	Secretory epithelial cells
CEBPB	CCL2	literature	6	0	0.29811	5.49299e-07	3.29579e-06	18.2109	CD4 T cells
SP1	TNFSF10	literature	0	1	0.20443	2.27413e-06	3.60071e-06	18.0833	CD8 T cells
TBX21	CCL3	literature	2	0	0.20415	2.62493e-06	4.08058e-06	17.9028	CD8 T cells
HIF1A	CCL5	literature	1	0	0.298458	1.70218e-06	4.46089e-06	17.7742	Plasma cells
HIF1A	TNFSF13B	literature	1	0	0.334704	3.82013e-08	4.52685e-06	17.7531	Myeloid DCs
JUN	CCL5	literature	4	0	0.272118	2.01549e-06	5.19244e-06	17.5552	Plasma cells
RORA	IL32	eY1H	0	0	0.292098	2.1797e-06	5.52191e-06	17.4664	Plasma cells
STAT3	CCL2	literature	2	0	0.211406	3.19585e-06	7.83499e-06	16.9616	Plasma cells
REL	CXCL10	both	1	0	0.371702	3.56313e-06	8.15905e-06	16.9032	Cilliated epithelial cells
JUND	CXCL8	literature	1	0	0.333196	3.80712e-06	9.18542e-06	16.7322	Plasma cells
IRF3	TNFSF10	literature	1	0	0.132156	7.43717e-06	9.84111e-06	16.6327	Neutrophils
IRF7	CCL3	literature	1	0	0.2431	1.26005e-06	9.98345e-06	16.612	NK cells
IRF7	CXCL10	literature	3	0	0.131871	7.92781e-06	1.19969e-05	16.347	CD8 T cells
CEBPB	CCL2	literature	6	0	0.376445	1.75444e-06	1.20472e-05	16.3409	NK cells
KLF6	CCL2	literature	1	0	0.28103	1.69515e-06	1.20472e-05	16.3409	NK cells
SPI1	TNFSF10	literature	1	0	0.215436	5.24823e-06	1.24645e-05	16.2918	Plasma cells
STAT1	CXCL10	literature	5	0	0.218275	2.73793e-06	1.3142e-05	16.2155	CD4 T cells
ETV6	CCL2	literature	0	0	0.220775	5.92367e-06	1.38523e-05	16.1395	Plasma cells
RXRA	TNFSF10	literature	0	0	0.217986	7.04987e-06	1.39601e-05	16.1283	Secretory epithelial cells
JUN	CCL2	literature	6	0	0.21841	3.39392e-06	1.5515e-05	15.976	CD4 T cells
REL	CCL4L2	eY1H	0	0	0.366339	2.75908e-06	1.77616e-05	15.7809	NK cells
STAT6	CXCL8	literature	0	1	0.171729	9.58581e-06	1.87957e-05	15.6992	Secretory epithelial cells
NR3C1	CCL2	literature	0	0	0.156985	1.25581e-05	1.88371e-05	15.6961	CD8 T cells
REL	CCL2	literature	2	0	0.354401	9.90566e-06	2.05933e-05	15.5675	Cilliated epithelial cells
CEBPB	CCL4	literature	4	1	0.234167	9.28173e-06	2.13306e-05	15.5167	Plasma cells
SPI1	IL1RN	literature	0	0	0.233374	9.40231e-06	2.13306e-05	15.5167	Plasma cells
SMAD3	CCL2	literature	0	1	0.273415	1.11233e-05	2.15986e-05	15.4987	Secretory epithelial cells
ETV6	CCL2	literature	0	0	0.169319	1.63547e-05	2.43187e-05	15.3276	CD8 T cells
NR3C1	CXCL8	literature	0	0	0.20745	1.28992e-05	2.457e-05	15.3127	Secretory epithelial cells
ZDHHC7	CCL2	eY1H	0	0	0.295512	1.33397e-05	2.51036e-05	15.2817	Secretory epithelial cells
IRF2	CXCL10	literature	1	0	0.305024	1.37967e-05	2.55495e-05	15.2563	Secretory epithelial cells
KLF3	IL32	eY1H	0	0	0.296808	1.15988e-05	2.5551e-05	15.2563	Plasma cells
STAT1	CCL3	literature	1	0	0.120745	1.75429e-05	2.58606e-05	15.2389	CD8 T cells
JUN	CXCL10	literature	0	0	0.278386	1.30906e-05	2.65168e-05	15.2027	Cilliated epithelial cells
IRF1	CCL2	literature	0	0	0.125383	1.8774e-05	2.7439e-05	15.1534	CD8 T cells
NR4A3	CCL2	literature	0	3	-0.115695	2.16608e-05	2.83756e-05	15.105	Neutrophils
RELA	CXCL8	literature	27	0	0.195089	1.57477e-05	2.88949e-05	15.0788	Secretory epithelial cells
RBPJ	CCL3L1	eY1H	0	0	0.266449	1.38533e-05	3.00815e-05	15.0208	Plasma cells
TFAP2A	CXCL8	both	1	0	0.236931	1.73618e-05	3.1567e-05	14.9512	Secretory epithelial cells
IRF7	CCL2	literature	1	0	0.112894	2.55862e-05	3.64604e-05	14.7433	CD8 T cells
STAT3	IL1RN	literature	1	0	0.231993	1.79521e-05	3.84327e-05	14.6673	Plasma cells
JUND	CXCL8	literature	1	0	0.146948	2.23568e-05	4.02826e-05	14.5995	Secretory epithelial cells
RELA	CCL2	literature	13	0	0.28251	2.29776e-05	4.10314e-05	14.5729	Secretory epithelial cells
JUN	CCL4	literature	0	0	0.221125	7.63233e-06	4.13753e-05	14.5609	NK cells
AHR	CXCL8	literature	1	0	0.177176	2.60598e-05	4.61235e-05	14.4041	Secretory epithelial cells
ETS1	CCL2	literature	2	0	0.224021	1.22237e-05	5.10206e-05	14.2586	CD4 T cells
MYC	CXCL8	literature	1	0	0.201204	3.06452e-05	5.32959e-05	14.1956	Secretory epithelial cells
KLF2	TNFSF10	eY1H	0	0	0.129742	4.34782e-05	6.09408e-05	14.0022	CD8 T cells
IRF7	CXCL10	literature	3	0	0.193692	1.96736e-05	7.55465e-05	13.6923	CD4 T cells
ATF3	CCL4L2	eY1H	0	0	0.279599	3.95905e-05	8.35799e-05	13.5465	Plasma cells
KLF2	TNFSF10	eY1H	0	0	0.16607	6.4864e-05	0.000108107	13.1753	Secretory epithelial cells
CEBPB	CCL4	literature	4	1	0.230018	2.31407e-05	0.000108341	13.1721	NK cells
NR4A1	CXCL8	literature	0	1	0.172113	7.49407e-05	0.000122884	12.9904	Secretory epithelial cells
REL	CXCL8	both	0	0	0.190218	7.49594e-05	0.000122884	12.9904	Secretory epithelial cells
JUNB	CCL2	literature	0	0	0.238244	7.69656e-05	0.000136636	12.8374	Cilliated epithelial cells
RBPJ	CCL3L1	eY1H	0	0	0.141661	9.91266e-05	0.00013781	12.825	CD8 T cells
IRF2	TNFSF10	both	0	0	0.154413	3.8807e-05	0.00013798	12.8232	CD4 T cells
BCL6	CCL2	literature	0	2	0.275333	7.94905e-05	0.000138016	12.8229	Cilliated epithelial cells
CREB1	CCL4	literature	1	0	0.137458	0.000102058	0.000140741	12.7947	CD8 T cells
RELA	CCL4	literature	1	0	0.334161	3.5273e-05	0.00015138	12.6895	NK cells
CEBPD	CCL2	literature	2	0	0.273339	0.000119969	0.00020165	12.2759	Cilliated epithelial cells
STAT2	CCL2	literature	0	0	0.244874	0.000131199	0.000218205	12.162	Cilliated epithelial cells
SPI1	CXCL8	literature	1	0	0.276766	0.00010625	0.000218244	12.1618	Plasma cells
NFATC3	TNFSF10	literature	1	0	0.278532	0.00011835	0.000239855	12.0255	Plasma cells
MITF	CXCL8	literature	0	1	0.21946	0.000148673	0.000241744	12.0142	Secretory epithelial cells
RELA	CCL3	literature	2	0	0.267723	0.000126771	0.000253543	11.9455	Plasma cells
NFKB1	TNFSF10	literature	1	0	0.201737	0.000135546	0.000267572	11.8678	Plasma cells
IRF8	TNFSF13B	literature	0	1	-0.309401	4.6384e-06	0.000274825	11.8292	Myeloid DCs
ATF3	CCL2	literature	1	2	0.205113	0.000171534	0.000276668	11.8196	Secretory epithelial cells
FOS	CCL2	literature	3	0	0.189973	0.000187793	0.000299617	11.7046	Secretory epithelial cells
XBP1	CXCL8	literature	1	0	-0.131065	0.000188759	0.000299617	11.7046	Secretory epithelial cells
HIF1A	CXCL8	literature	1	1	0.171698	0.000195937	0.000308563	11.6621	Secretory epithelial cells
STAT3	CCL2	literature	2	0	0.231597	0.000190729	0.000310673	11.6523	Cilliated epithelial cells
CEBPG	CXCL8	literature	1	0	0.17359	0.00020509	0.000320454	11.6076	Secretory epithelial cells
NR4A1	CCL4	literature	0	1	0.102418	0.000263576	0.000330416	11.5634	Neutrophils
IRF1	CCL2	literature	0	0	0.197878	0.000122169	0.000404422	11.2719	CD4 T cells
IRF7	CXCL10	literature	3	0	0.255488	1.05618e-05	0.000419339	11.2196	Myeloid DCs
NFATC2	TNFSF10	literature	1	0	0.237416	0.000218696	0.000420782	11.2146	Plasma cells
NFIC	CCL2	literature	1	0	0.203943	0.000386537	0.000599282	10.7045	Secretory epithelial cells
STAT1	TNFSF13B	literature	0	0	0.242855	1.85933e-05	0.000629518	10.6335	Myeloid DCs
IRF7	CCL2	literature	1	0	0.137719	0.000335959	0.000630441	10.6314	Plasma cells
REL	CCL2	literature	2	0	-0.234031	0.000354431	0.000656994	10.5718	Plasma cells
NFKB1	CCL3	literature	0	1	0.328451	0.000173454	0.000661697	10.5615	NK cells
KLF3	IL32	eY1H	0	0	0.213928	0.00044244	0.000680677	10.5207	Secretory epithelial cells
TBX21	CCL3	literature	2	0	0.298591	0.0002061	0.000758153	10.3652	NK cells
RUNX1	TNFSF10	literature	1	0	0.217883	0.000434383	0.000786027	10.3131	Plasma cells
CEBPB	CCL5	literature	2	1	0.225369	0.000446193	0.000797898	10.2915	Plasma cells
REL	IL32	eY1H	0	0	0.240013	0.000464689	0.000821311	10.2498	Plasma cells
RUNX1	TNFSF10	literature	1	0	0.126482	0.000558398	0.000852516	10.196	Secretory epithelial cells
IRF1	CXCL8	literature	0	0	0.225456	0.000496394	0.000867263	10.1712	Plasma cells
ATF3	CCL3	literature	0	3	0.216285	0.000620377	0.00107156	9.86607	Plasma cells
KLF6	CCL2	literature	1	0	0.28635	3.94585e-05	0.00116896	9.74056	Myeloid DCs
YY1	CXCL8	literature	1	0	0.135792	0.000780086	0.00117306	9.73551	Secretory epithelial cells
CREB1	CXCL8	literature	1	0	0.185477	0.00087268	0.00130251	9.58449	Secretory epithelial cells
HSF1	CXCL8	literature	0	0	0.1506	0.000888602	0.00131645	9.56913	Secretory epithelial cells
CEBPB	CCL8	literature	0	1	0.247818	0.000882054	0.00134004	9.5435	Cilliated epithelial cells
IRF2	CXCL10	literature	1	0	0.246245	0.00102018	0.00153512	9.34743	Cilliated epithelial cells
ATF3	CCL2	literature	1	2	0.145277	0.00121784	0.00160192	9.28598	CD8 T cells
REL	CCL4L2	eY1H	0	0	0.239339	0.000939723	0.00160492	9.28328	Plasma cells
MAZ	TNFSF10	eY1H	0	0	0.151122	0.00110742	0.00162856	9.26219	Secretory epithelial cells
STAT1	CXCL10	literature	5	0	0.143752	0.00104652	0.00176745	9.14411	Plasma cells
IRF3	CCL2	literature	1	0	0.212183	0.00120654	0.00201533	8.95477	Plasma cells
NR4A2	CXCL8	literature	1	1	0.162947	0.00143614	0.00209656	8.89776	Secretory epithelial cells
JUN	CXCL8	literature	11	0	0.206178	0.00144835	0.00239293	8.70701	Plasma cells
MAX	CCL2	literature	1	0	0.230922	0.00198575	0.00282656	8.46673	Cilliated epithelial cells
STAT1	CCL3	literature	1	0	0.148632	0.00174916	0.00284948	8.45508	Plasma cells
SPI1	CCL5	literature	1	0	0.23613	0.00176218	0.00284948	8.45508	Plasma cells
RELA	CCL2	literature	13	0	0.249044	0.00219294	0.00309361	8.3365	Cilliated epithelial cells
IRF8	CXCL9	literature	0	0	0.316537	0.000173784	0.00343224	8.18663	Myeloid DCs
IRF1	CXCL10	literature	3	0	0.166557	0.00136338	0.00373956	8.06291	CD4 T cells
SP3	CCL2	literature	1	0	0.218774	0.00242528	0.00388045	8.00956	Plasma cells
JUNB	CCL2	literature	0	0	0.146799	0.0027854	0.00400777	7.96299	Secretory epithelial cells
HIF1A	CCL2	literature	2	0	0.185319	0.00170985	0.00435049	7.8446	CD4 T cells
STAT2	CCL2	literature	0	0	0.200067	0.00172207	0.00435049	7.8446	CD4 T cells
KLF2	TNFSF10	eY1H	0	0	-0.129832	0.00171261	0.00435049	7.8446	CD4 T cells
CEBPD	CCL2	literature	2	0	0.164097	0.00324054	0.00462934	7.75498	Secretory epithelial cells
XBP1	CCL2	literature	1	0	0.144778	0.00326428	0.00463019	7.75471	Secretory epithelial cells
KLF3	TNFSF10	eY1H	0	0	0.117215	0.00391773	0.00499949	7.644	CD8 T cells
MAFB	CCL2	literature	1	0	0.344871	0.000275046	0.00501429	7.63974	Myeloid DCs
KLF2	TNFSF10	eY1H	0	0	0.141812	0.00320853	0.00508017	7.62091	Plasma cells
JUN	IL1RN	literature	1	0	-0.100978	0.00377543	0.00528032	7.56516	Secretory epithelial cells
NFIL3	CXCL8	eY1H	0	0	0.200783	0.0038064	0.00528666	7.56343	Secretory epithelial cells
CEBPB	CXCL8	literature	4	1	0.198733	0.00343072	0.00532112	7.55405	Plasma cells
ETV6	CCL2	literature	0	0	0.192484	0.0040767	0.00565017	7.46749	Cilliated epithelial cells
NFIB	CCL2	literature	1	0	0.206138	0.00432569	0.00596647	7.38891	Secretory epithelial cells
DDIT3	CXCL8	literature	2	0	0.136269	0.00464418	0.00636189	7.29633	Secretory epithelial cells
XBP1	CCL2	literature	1	0	0.253016	0.00191813	0.00637316	7.29378	NK cells
ELF3	CCL2	eY1H	0	0	-0.127872	0.00488454	0.00664563	7.23338	Secretory epithelial cells
IRF7	CCL2	literature	1	0	0.13304	0.00282035	0.00676883	7.20688	CD4 T cells
MAFG	CXCL8	eY1H	0	0	0.148781	0.0056951	0.00761085	7.03773	Secretory epithelial cells
IRX5	TNFSF10	eY1H	0	0	0.17366	0.00570814	0.00761085	7.03773	Secretory epithelial cells
IRF2	CXCL10	literature	1	0	0.100795	0.00613382	0.0077695	7.00796	CD8 T cells
IRF7	CCL3	literature	1	0	0.132718	0.00524588	0.00797374	6.97053	Plasma cells
NFKB1	CCL2	literature	3	1	0.105415	0.00741948	0.00932891	6.74408	CD8 T cells
MAX	CCL2	literature	1	0	0.158014	0.00662954	0.00997712	6.64716	Plasma cells
RUNX1	CCL3	literature	2	0	0.199658	0.00673334	0.010034	6.63896	Plasma cells
IRF3	CCL2	literature	1	0	0.219529	0.00754918	0.0101082	6.62833	Cilliated epithelial cells
JUN	CCL2	literature	6	0	0.121687	0.00806423	0.0106811	6.5488	Secretory epithelial cells
IRF1	CXCL10	literature	3	0	0.522369	0.000387432	0.0110346	6.50182	B cells
STAT1	TNFSF10	literature	1	0	0.3886	0.000308818	0.0110346	6.50182	B cells
NFIB	CCL2	literature	1	0	0.211321	0.00851744	0.0113089	6.4664	Cilliated epithelial cells
NR3C1	CCL2	literature	0	0	0.18457	0.00538151	0.0114805	6.44467	CD4 T cells
IRF1	TNFSF10	literature	3	0	0.134545	0.00384049	0.0116344	6.42546	NK cells
PRDM1	CCL2	literature	0	1	0.188509	0.00590105	0.0123152	6.34341	CD4 T cells
NFKB1	IL1RN	literature	0	0	0.165253	0.00844793	0.012347	6.3397	Plasma cells
NR3C1	CCL2	literature	0	0	0.200306	0.0105977	0.0138384	6.17518	Cilliated epithelial cells
IRF3	CXCL8	literature	1	0	0.131662	0.0107036	0.0139916	6.1593	Secretory epithelial cells
ZNF281	CXCL8	literature	1	0	0.183347	0.0107026	0.0139916	6.1593	Secretory epithelial cells
FOS	CCL5	literature	2	0	0.161445	0.00995904	0.0144169	6.1161	Plasma cells
FOS	CXCL8	literature	6	0	0.161296	0.0104841	0.0150337	6.05565	Plasma cells
IRF2	TNFSF13B	both	1	0	0.213635	0.00108636	0.0151451	6.04501	Myeloid DCs
STAT3	CCL2	literature	2	0	0.154244	0.00839698	0.0158061	5.98338	CD4 T cells
NFKB1	TNFSF13B	literature	0	0	0.19886	0.00123972	0.016323	5.93695	Myeloid DCs
YY1	CCL4	literature	1	0	0.174749	0.0117893	0.0167474	5.89992	Plasma cells
HIF1A	CCL2	literature	2	0	0.213654	0.00571102	0.0168067	5.89482	NK cells
ATF3	CCL4	both	1	3	0.168166	0.0126967	0.0178695	5.80636	Plasma cells
STAT1	TNFSF10	literature	1	0	0.180886	0.00151248	0.0181867	5.78097	Myeloid DCs
IRF1	CXCL10	literature	3	0	0.145052	0.01442	0.0183695	5.76654	Secretory epithelial cells
DDIT3	CCL2	literature	1	2	0.157716	0.0155199	0.0196455	5.66966	Secretory epithelial cells
IRF2	TNFSF10	both	0	0	0.440836	0.000953901	0.0200319	5.64155	B cells
IRF1	CXCL10	literature	3	0	0.116359	0.0150601	0.0210012	5.57338	Plasma cells
STAT2	CCL2	literature	0	0	0.245729	0.00784162	0.0218186	5.5183	NK cells
NFKB1	CCL3	literature	0	1	0.151068	0.0175093	0.0241947	5.36916	Plasma cells
IRF2	TNFSF10	both	0	0	0.151246	0.0096448	0.0248354	5.33146	NK cells
REL	CXCL10	both	1	0	-0.166487	0.0187626	0.0256929	5.28249	Plasma cells
SP1	CXCL8	literature	1	0	0.111268	0.0216225	0.0268603	5.21838	Secretory epithelial cells
CEBPB	CCL2	literature	6	0	0.267026	0.00271759	0.0292758	5.09415	Myeloid DCs
CEBPB	CCL3	literature	7	0	0.300366	0.00294521	0.0303484	5.04223	Myeloid DCs
ZNF710	TNFSF10	eY1H	0	0	0.14393	0.0248472	0.0306756	5.02676	Secretory epithelial cells
JUN	CCL2	literature	6	0	0.127942	0.0252138	0.0308821	5.01709	Cilliated epithelial cells
NR4A2	CCL2	literature	0	4	0.179205	0.0251933	0.0308821	5.01709	Cilliated epithelial cells
NR3C1	CCL2	literature	0	0	0.221392	0.0127258	0.0319697	4.96715	NK cells
JUN	CCL4	literature	0	0	0.110441	0.0248004	0.0336577	4.89292	Plasma cells
NR4A1	CCL2	literature	0	1	0.149446	0.030796	0.0377865	4.72599	Secretory epithelial cells
KLF3	IL1RN	eY1H	0	0	0.161115	0.0293433	0.0391244	4.67579	Plasma cells
IRF7	TNFSF10	literature	1	0	0.30661	0.00265003	0.0397504	4.65289	B cells
ETV6	CCL7	literature	0	0	0.152024	0.0303702	0.0401415	4.63876	Plasma cells
JUNB	CCL2	literature	0	0	0.111637	0.0236099	0.04121	4.60086	CD4 T cells
NFKB1	IL1RN	literature	0	0	-0.227063	0.00449388	0.042602	4.55293	Myeloid DCs
IRF2	CXCL10	literature	1	0	0.140135	0.0270301	0.0463374	4.43168	CD4 T cells
CREM	CCL4	literature	0	1	0.122777	0.035678	0.0467504	4.41888	Plasma cells
SP1	TNFSF10	literature	0	1	-0.340664	0.00629452	0.0497267	4.32983	Myeloid DCs
