# Supplementary material for: Therapeutic Targeting of Transcription Factors to Control the Cytokine Release Syndrome in COVID-19
Source: Front Pharmacol. 2021 Jun 7;12:673485. doi: 10.3389/fphar.2021.673485 (PMC8215608; doi:10.3389/fphar.2021.673485)
Supplement: Supplementary file 4 [file Table1.XLSX]

## Sheet: notes
Supplementary Table S1. Differential expression of TFs and cytokines in BALFs of COVID-19 patients compared to healthy controls.

## Sheet: all.nodes
Gene name	Gene type	avg_logFC	p_val	p_val_adj	Cell type
CCL2	Cytokine	1.26237	5.29619e-64	1.77629e-59	CD4 T cells
CCL2	Cytokine	2.52941	5.76543e-181	1.93367e-176	CD8 T cells
CCL2	Cytokine	2.33516	2.7863e-148	9.34496e-144	Cilliated epithelial cells
CCL2	Cytokine	4.61743	0	0	Macrophages
CCL2	Cytokine	2.44799	1.23845e-63	4.15362e-59	Myeloid DCs
CCL2	Cytokine	4.87359	0	0	Neutrophils
CCL2	Cytokine	1.51804	2.08661e-34	6.99828e-30	NK cells
CCL2	Cytokine	3.32574	9.25083e-182	3.10263e-177	Plasma cells
CCL2	Cytokine	2.3427	2.08654e-261	6.99805e-257	Secretory epithelial cells
CCL3	Cytokine	1.34431	1.89066e-96	6.34108e-92	CD8 T cells
CCL3	Cytokine	2.43438	0	0	Macrophages
CCL3	Cytokine	1.24186	3.99997e-31	1.34155e-26	Myeloid DCs
CCL3	Cytokine	2.43941	0	0	Neutrophils
CCL3	Cytokine	1.68403	1.57529e-22	5.28336e-18	NK cells
CCL3	Cytokine	1.50617	4.59482e-69	1.54106e-64	Plasma cells
CCL3L1	Cytokine	1.39125	2.09101e-90	7.01304e-86	CD8 T cells
CCL3L1	Cytokine	2.22687	0	0	Macrophages
CCL3L1	Cytokine	3.0479	0	0	Neutrophils
CCL3L1	Cytokine	1.65297	1.28582e-73	4.31252e-69	Plasma cells
CCL4	Cytokine	1.69948	1.09935e-136	3.68709e-132	CD8 T cells
CCL4	Cytokine	2.41599	0	0	Macrophages
CCL4	Cytokine	2.67558	0	0	Neutrophils
CCL4	Cytokine	2.32397	3.13017e-25	1.04983e-20	NK cells
CCL4	Cytokine	1.85178	1.96659e-69	6.59576e-65	Plasma cells
CCL4L2	Cytokine	2.08716	1.19598e-93	4.01119e-89	CD8 T cells
CCL4L2	Cytokine	2.424	0	0	Macrophages
CCL4L2	Cytokine	2.80173	0	0	Neutrophils
CCL4L2	Cytokine	3.06664	1.2042e-20	4.03878e-16	NK cells
CCL4L2	Cytokine	1.91992	1.3435e-50	4.50595e-46	Plasma cells
CCL5	Cytokine	1.25994	5.0203e-56	1.68376e-51	Plasma cells
CCL7	Cytokine	2.84631	0	0	Macrophages
CCL7	Cytokine	1.43953	8.74132e-67	2.93175e-62	Plasma cells
CCL8	Cytokine	1.64206	3.20955e-104	1.07645e-99	CD8 T cells
CCL8	Cytokine	1.43019	2.36509e-80	7.93229e-76	Cilliated epithelial cells
CCL8	Cytokine	3.73546	0	0	Macrophages
CCL8	Cytokine	1.287	2.54984e-116	8.55191e-112	Secretory epithelial cells
CXCL10	Cytokine	1.90279	1.15902e-09	3.88722e-05	B cells
CXCL10	Cytokine	1.18647	3.42739e-57	1.14951e-52	CD4 T cells
CXCL10	Cytokine	1.7894	1.9948e-120	6.69036e-116	CD8 T cells
CXCL10	Cytokine	1.47744	1.95354e-90	6.55197e-86	Cilliated epithelial cells
CXCL10	Cytokine	3.43501	0	0	Macrophages
CXCL10	Cytokine	3.33731	3.18189e-131	1.06717e-126	Myeloid DCs
CXCL10	Cytokine	3.38491	0	0	Neutrophils
CXCL10	Cytokine	2.36244	2.37727e-104	7.97314e-100	Plasma cells
CXCL10	Cytokine	1.39781	8.26388e-117	2.77162e-112	Secretory epithelial cells
CXCL11	Cytokine	1.45289	0	0	Macrophages
CXCL11	Cytokine	2.04561	0	0	Neutrophils
CXCL8	Cytokine	1.86668	0	0	Macrophages
CXCL8	Cytokine	1.91291	0	0	Neutrophils
CXCL8	Cytokine	1.01382	3.00433e-49	1.00762e-44	Plasma cells
CXCL8	Cytokine	1.62388	4.45856e-234	1.49536e-229	Secretory epithelial cells
CXCL9	Cytokine	1.5687	1.67556e-45	5.61965e-41	Myeloid DCs
IL1RN	Cytokine	2.26508	0	0	Macrophages
IL1RN	Cytokine	1.53167	6.03446e-59	2.0239e-54	Myeloid DCs
IL1RN	Cytokine	2.86016	0	0	Neutrophils
IL1RN	Cytokine	1.51278	3.45634e-61	1.15922e-56	Plasma cells
IL1RN	Cytokine	1.13035	2.02044e-204	6.77635e-200	Secretory epithelial cells
IL32	Cytokine	1.51368	4.70011e-117	1.57637e-112	Plasma cells
IL32	Cytokine	1.19226	1.64698e-144	5.52379e-140	Secretory epithelial cells
TNFSF10	Cytokine	2.21103	6.49728e-21	2.17912e-16	B cells
TNFSF10	Cytokine	1.70781	1.72033e-133	5.76982e-129	CD4 T cells
TNFSF10	Cytokine	1.61888	1.44691e-284	4.85279e-280	CD8 T cells
TNFSF10	Cytokine	2.23821	0	0	Macrophages
TNFSF10	Cytokine	2.05693	3.27305e-102	1.09775e-97	Myeloid DCs
TNFSF10	Cytokine	2.64282	0	0	Neutrophils
TNFSF10	Cytokine	1.82347	3.28879e-60	1.10303e-55	NK cells
TNFSF10	Cytokine	1.86595	1.60276e-148	5.37551e-144	Plasma cells
TNFSF10	Cytokine	1.00918	3.85634e-141	1.29338e-136	Secretory epithelial cells
TNFSF13B	Cytokine	1.43237	0	0	Macrophages
TNFSF13B	Cytokine	1.24172	1.38262e-60	4.63716e-56	Myeloid DCs
TNFSF13B	Cytokine	1.58372	0	0	Neutrophils
BACH1	TF	0.43506	0	0	Macrophages
BACH1	TF	0.600011	2.85104e-217	9.5621e-213	Neutrophils
BACH1	TF	0.0434027	5.8041e-10	1.94664e-05	Secretory epithelial cells
BCL6	TF	0.367455	3.63695e-62	1.2198e-57	Cilliated epithelial cells
BCL6	TF	0.382502	0	0	Macrophages
BCL6	TF	0.483466	1.65335e-131	5.54517e-127	Neutrophils
BCL6	TF	0.254931	3.88666e-39	1.30355e-34	Secretory epithelial cells
CEBPB	TF	-0.161947	1.67269e-21	5.61003e-17	CD4 T cells
CEBPB	TF	-0.374595	7.36454e-75	2.46999e-70	CD8 T cells
CEBPB	TF	-0.335921	2.35549e-32	7.90009e-28	Cilliated epithelial cells
CEBPB	TF	-0.0630666	8.44975e-57	2.83396e-52	Macrophages
CEBPB	TF	0.132786	0.0862854	1	Myeloid DCs
CEBPB	TF	0.0582979	0.260845	1	Neutrophils
CEBPB	TF	-0.173121	7.67551e-08	0.00257429	NK cells
CEBPB	TF	-0.555871	1.82698e-49	6.12752e-45	Plasma cells
CEBPB	TF	-0.675648	1.29466e-105	4.34215e-101	Secretory epithelial cells
CEBPD	TF	0.187291	2.0294e-12	6.80641e-08	Cilliated epithelial cells
CEBPD	TF	0.750663	0	0	Macrophages
CEBPD	TF	0.959667	0	0	Neutrophils
CEBPD	TF	0.455283	7.5211e-48	2.5225e-43	Secretory epithelial cells
CEBPG	TF	0.157033	3.27289e-122	1.0977e-117	Macrophages
CEBPG	TF	0.329829	2.61891e-30	8.78357e-26	Secretory epithelial cells
CREM	TF	0.192097	1.00115e-91	3.35776e-87	CD8 T cells
CREM	TF	0.818091	0	0	Macrophages
CREM	TF	0.902593	0	0	Neutrophils
CREM	TF	0.161767	6.60784e-13	2.2162e-08	NK cells
CREM	TF	0.808765	8.00299e-75	2.68412e-70	Plasma cells
DDIT3	TF	0.492497	0	0	Macrophages
DDIT3	TF	0.568385	5.06232e-163	1.69785e-158	Neutrophils
DDIT3	TF	1.04341	4.87486e-31	1.63498e-26	Secretory epithelial cells
ELF2	TF	0.0461583	2.36292e-28	7.92501e-24	Macrophages
ELF2	TF	0.0685853	2.7078e-11	9.08169e-07	Secretory epithelial cells
ELF3	TF	0.696412	9.71301e-82	3.25765e-77	Cilliated epithelial cells
ELF3	TF	1.20909	4.65011e-245	1.5596e-240	Secretory epithelial cells
ETS1	TF	0.107652	2.25878e-32	7.57572e-28	CD4 T cells
ETS1	TF	0.651707	1.67574e-68	5.62025e-64	Plasma cells
ETS2	TF	0.379899	2.04061e-299	6.844e-295	Macrophages
ETS2	TF	0.478341	3.66632e-134	1.22965e-129	Neutrophils
ETS2	TF	0.614775	5.48776e-90	1.84054e-85	Secretory epithelial cells
ETV6	TF	0.349195	8.21694e-65	2.75588e-60	CD8 T cells
ETV6	TF	0.488323	2.39723e-87	8.04008e-83	Cilliated epithelial cells
ETV6	TF	0.567242	0	0	Macrophages
ETV6	TF	0.504847	2.36476e-61	7.93117e-57	Plasma cells
ETV6	TF	0.41587	8.07871e-91	2.70952e-86	Secretory epithelial cells
FOSB	TF	0.891429	0	0	Macrophages
FOSB	TF	1.0356	0	0	Neutrophils
FOXO3	TF	0.022723	2.24515e-14	7.53001e-10	Macrophages
HHEX	TF	-0.0142054	1.44875e-21	4.85896e-17	Macrophages
HSF1	TF	0.189844	5.23189e-27	1.75472e-22	Secretory epithelial cells
IRF1	TF	0.363707	0.00123998	1	B cells
IRF1	TF	0.412399	1.28563e-45	4.31187e-41	CD4 T cells
IRF1	TF	0.478792	3.67179e-112	1.23148e-107	CD8 T cells
IRF1	TF	0.916155	7.57937e-115	2.54204e-110	Cilliated epithelial cells
IRF1	TF	0.965607	0	0	Macrophages
IRF1	TF	1.13127	0	0	Neutrophils
IRF1	TF	0.363951	1.05674e-09	3.54421e-05	NK cells
IRF1	TF	0.921926	2.25879e-102	7.57576e-98	Plasma cells
IRF1	TF	0.854344	6.57511e-129	2.20523e-124	Secretory epithelial cells
IRF2	TF	0.470767	1.35421e-06	0.0454188	B cells
IRF2	TF	0.460037	5.18638e-36	1.73946e-31	CD4 T cells
IRF2	TF	0.413927	1.4473e-82	4.8541e-78	CD8 T cells
IRF2	TF	0.212391	4.93466e-20	1.65504e-15	Cilliated epithelial cells
IRF2	TF	0.423406	0	0	Macrophages
IRF2	TF	0.54612	6.43178e-39	2.15715e-34	Myeloid DCs
IRF2	TF	0.552642	7.58887e-199	2.54523e-194	Neutrophils
IRF2	TF	0.235747	4.13236e-09	0.000138595	NK cells
IRF2	TF	0.366508	1.71304e-37	5.74538e-33	Plasma cells
IRF2	TF	0.137052	4.65401e-11	1.56091e-06	Secretory epithelial cells
IRF3	TF	0.0106548	1.75637e-37	5.89068e-33	CD8 T cells
IRF3	TF	0.167081	1.18948e-15	3.98941e-11	Cilliated epithelial cells
IRF3	TF	-0.068111	4.95519e-35	1.66192e-30	Macrophages
IRF3	TF	-0.12254	2.04266e-43	6.85088e-39	Neutrophils
IRF3	TF	0.172522	2.33107e-27	7.81817e-23	Plasma cells
IRF3	TF	0.0130255	0.000892288	1	Secretory epithelial cells
IRF4	TF	0.424858	7.58799e-99	2.54494e-94	CD8 T cells
IRF5	TF	0.297302	0	0	Macrophages
IRF5	TF	0.250505	2.20891e-62	7.40848e-58	Neutrophils
IRF7	TF	1.82338	3.17541e-20	1.065e-15	B cells
IRF7	TF	1.50889	4.25624e-188	1.4275e-183	CD4 T cells
IRF7	TF	1.49496	0	0	CD8 T cells
IRF7	TF	1.09561	9.14785e-196	3.0681e-191	Cilliated epithelial cells
IRF7	TF	1.44994	0	0	Macrophages
IRF7	TF	1.53687	1.32951e-112	4.45905e-108	Myeloid DCs
IRF7	TF	1.75344	0	0	Neutrophils
IRF7	TF	1.66498	5.98258e-85	2.0065e-80	NK cells
IRF7	TF	1.66091	6.25559e-234	2.09806e-229	Plasma cells
IRF7	TF	1.03608	3.03282e-238	1.01718e-233	Secretory epithelial cells
IRF8	TF	0.160897	9.78899e-97	3.28313e-92	Macrophages
IRF8	TF	0.633812	9.53464e-27	3.19782e-22	Myeloid DCs
IRF8	TF	0.264423	2.20424e-49	7.39279e-45	Neutrophils
IRX5	TF	0.103601	9.27635e-30	3.1112e-25	Secretory epithelial cells
JUNB	TF	0.310516	3.46442e-21	1.16193e-16	CD4 T cells
JUNB	TF	0.247539	4.62333e-62	1.55062e-57	CD8 T cells
JUNB	TF	0.853062	5.09233e-39	1.70792e-34	Cilliated epithelial cells
JUNB	TF	0.95019	3.65956e-80	1.22738e-75	Plasma cells
JUNB	TF	0.545798	1.43638e-30	4.81746e-26	Secretory epithelial cells
JUND	TF	0.235055	2.5522488191654e-315	8.55998731459884e-311	Macrophages
JUND	TF	0.244303	7.77784e-69	2.60861e-64	Neutrophils
JUND	TF	0.000555568	1.53989e-14	5.16465e-10	Plasma cells
JUND	TF	0.15712	5.51786e-14	1.85063e-09	Secretory epithelial cells
KLF2	TF	0.415394	5.17955e-16	1.73717e-11	CD4 T cells
KLF2	TF	0.603801	1.55857e-59	5.2273e-55	CD8 T cells
KLF2	TF	0.879933	3.71932e-64	1.24742e-59	Plasma cells
KLF2	TF	0.358991	1.07419e-40	3.60274e-36	Secretory epithelial cells
KLF3	TF	0.138508	1.34521e-13	4.51171e-09	CD8 T cells
KLF3	TF	0.390503	0	0	Macrophages
KLF3	TF	0.41861	1.53672e-113	5.15399e-109	Neutrophils
KLF3	TF	0.233316	2.58798e-18	8.67984e-14	Plasma cells
KLF3	TF	0.446961	4.24336e-74	1.42318e-69	Secretory epithelial cells
KLF4	TF	0.640046	0	0	Macrophages
KLF4	TF	0.776477	2.87771e-277	9.65155e-273	Neutrophils
KLF6	TF	0.635091	5.29421e-67	1.77562e-62	CD4 T cells
KLF6	TF	0.691746	4.53252e-117	1.52016e-112	CD8 T cells
KLF6	TF	1.10187	4.19221e-114	1.40603e-109	Cilliated epithelial cells
KLF6	TF	1.96407	0	0	Macrophages
KLF6	TF	1.20806	3.25298e-66	1.09102e-61	Myeloid DCs
KLF6	TF	2.05364	0	0	Neutrophils
KLF6	TF	0.714074	2.74445e-27	9.20462e-23	NK cells
KLF6	TF	1.43312	4.03206e-114	1.35231e-109	Plasma cells
KLF6	TF	1.17874	6.38621e-198	2.14187e-193	Secretory epithelial cells
MAFB	TF	0.461791	1.19878e-21	4.02058e-17	CD8 T cells
MAFB	TF	0.84731	1.0765e-46	3.61048e-42	Cilliated epithelial cells
MAFB	TF	1.79636	0	0	Macrophages
MAFB	TF	0.760869	5.00251e-18	1.67779e-13	Myeloid DCs
MAFB	TF	1.94508	0	0	Neutrophils
MAFB	TF	0.767578	2.10678e-25	7.06594e-21	Plasma cells
MAFB	TF	0.684437	2.73339e-35	9.16753e-31	Secretory epithelial cells
MAFG	TF	0.227741	1.45006e-249	4.86335e-245	Macrophages
MAFG	TF	0.198685	6.71911e-23	2.25352e-18	Secretory epithelial cells
MAFK	TF	0.390672	1.73277e-88	5.81155e-84	Secretory epithelial cells
MAX	TF	0.166759	7.7449e-26	2.59756e-21	Cilliated epithelial cells
MAX	TF	0.301712	0	0	Macrophages
MAX	TF	0.242123	9.25012e-30	3.1024e-25	Plasma cells
MAX	TF	0.21129	7.36026e-40	2.46856e-35	Secretory epithelial cells
MAZ	TF	0.0761323	1.46853e-43	4.92531e-39	CD8 T cells
MAZ	TF	0.0690399	9.70588e-51	3.25525e-46	Macrophages
MAZ	TF	-0.0272531	1.49004e-16	4.99743e-12	Neutrophils
MAZ	TF	0.110448	1.30261e-23	4.36881e-19	Plasma cells
MAZ	TF	0.0525796	1.18805e-07	0.00398461	Secretory epithelial cells
MEF2A	TF	0.208575	8.50905e-187	2.85385e-182	Macrophages
MEF2A	TF	0.265398	2.96677e-55	9.95025e-51	Neutrophils
MEF2A	TF	-0.0113058	5.27191e-06	0.176815	Secretory epithelial cells
MITF	TF	0.0896182	2.68092e-46	8.99154e-42	Macrophages
MITF	TF	-0.0278082	3.952e-10	1.32546e-05	Secretory epithelial cells
NFAT5	TF	0.0760453	1.31569e-48	4.41271e-44	Macrophages
NFAT5	TF	0.231662	2.34213e-37	7.85526e-33	Secretory epithelial cells
NFATC2	TF	0.485118	6.67334e-135	2.23817e-130	CD8 T cells
NFATC2	TF	0.420903	9.344e-42	3.13389e-37	Plasma cells
NFATC3	TF	0.135219	7.70203e-50	2.58318e-45	CD8 T cells
NFATC3	TF	-0.046321	2.72061e-21	9.12467e-17	Macrophages
NFATC3	TF	0.0862395	1.54236e-11	5.17293e-07	Plasma cells
NFATC3	TF	-0.0448348	0.00140411	1	Secretory epithelial cells
NFE2L2	TF	0.429699	0	0	Macrophages
NFE2L2	TF	0.486456	3.05987e-152	1.02625e-147	Neutrophils
NFIB	TF	0.0830508	1.46069e-16	4.89901e-12	Cilliated epithelial cells
NFIB	TF	0.179108	5.52429e-38	1.85279e-33	Secretory epithelial cells
NFIC	TF	0.388919	9.17215e-60	3.07625e-55	Secretory epithelial cells
NFIL3	TF	0.242591	2.14766e-257	7.20303e-253	Macrophages
NFIL3	TF	0.252185	5.87125e-62	1.96916e-57	Neutrophils
NFIL3	TF	0.104272	1.32077e-12	4.42973e-08	Secretory epithelial cells
NR4A1	TF	0.577751	7.87862e-118	2.64241e-113	Neutrophils
NR4A1	TF	0.467871	9.63482e-26	3.23142e-21	Secretory epithelial cells
NR4A2	TF	0.198611	7.69736e-26	2.58162e-21	Cilliated epithelial cells
NR4A2	TF	0.304149	0	0	Macrophages
NR4A2	TF	0.359989	2.97984e-107	9.9941e-103	Neutrophils
NR4A2	TF	0.11771	3.8361e-14	1.28659e-09	Secretory epithelial cells
PLAGL1	TF	-0.0110471	5.86578e-15	1.96732e-10	Neutrophils
PRDM1	TF	0.215008	1.98985e-21	6.67377e-17	CD4 T cells
PREB	TF	0.114173	3.29457e-177	1.10497e-172	Macrophages
RBPJ	TF	-0.0369981	5.57382e-27	1.8694e-22	CD8 T cells
RBPJ	TF	0.136335	5.3053e-31	1.77934e-26	Macrophages
RBPJ	TF	0.0664697	5.12509e-12	1.7189e-07	Neutrophils
RBPJ	TF	-0.14013	4.31675e-09	0.000144779	Plasma cells
REL	TF	-0.00119148	1.01804e-25	3.41439e-21	CD8 T cells
REL	TF	0.105222	1.16532e-15	3.90837e-11	Cilliated epithelial cells
REL	TF	0.243773	8.39096e-154	2.81424e-149	Macrophages
REL	TF	0.320846	2.10925e-69	7.0742e-65	Neutrophils
REL	TF	0.266347	4.79255e-06	0.160737	NK cells
REL	TF	-0.0914804	0.0019427	1	Plasma cells
REL	TF	0.0150396	0.000269711	1	Secretory epithelial cells
RELB	TF	0.517514	0	0	Macrophages
RELB	TF	0.621852	0	0	Neutrophils
RELB	TF	0.652376	2.65752e-111	8.91305e-107	Plasma cells
RELB	TF	0.446081	7.45403e-111	2.50001e-106	Secretory epithelial cells
RUNX1	TF	-0.236387	1.34408e-23	4.50791e-19	CD8 T cells
RUNX1	TF	0.0776186	7.39603e-76	2.48055e-71	Macrophages
RUNX1	TF	0.0874782	5.99813e-05	1	Neutrophils
RUNX1	TF	-0.233269	8.47124e-14	2.84117e-09	Plasma cells
RUNX1	TF	-0.0264073	0.000453456	1	Secretory epithelial cells
SMAD3	TF	0.437349	8.58118e-144	2.87804e-139	Secretory epithelial cells
SMAD4	TF	0.00993854	4.35931e-13	1.46207e-08	Macrophages
SP1	TF	-0.00523385	8.52592e-12	2.85951e-07	CD8 T cells
SP1	TF	0.0485124	3.03142e-20	1.01671e-15	Macrophages
SP1	TF	-0.0723087	3.3007e-05	1	Myeloid DCs
SP1	TF	0.0190384	1.24248e-17	4.16714e-13	Neutrophils
SP1	TF	0.166169	1.17898e-34	3.95418e-30	Secretory epithelial cells
SP3	TF	0.112633	2.75143e-63	9.22802e-59	Macrophages
SP3	TF	0.0933371	2.3816e-18	7.98764e-14	Plasma cells
SP3	TF	0.151518	4.84821e-24	1.62604e-19	Secretory epithelial cells
SP4	TF	0.129017	8.1433e-33	2.73118e-28	CD8 T cells
SPI1	TF	-0.644688	3.89575e-73	1.30659e-68	CD8 T cells
SPI1	TF	-0.6389	4.08544e-56	1.37022e-51	Plasma cells
STAT1	TF	1.1341	3.73414e-08	0.00125239	B cells
STAT1	TF	1.4388	2.63527e-137	8.83845e-133	CD4 T cells
STAT1	TF	1.31345	2.1016e-303	7.04854e-299	CD8 T cells
STAT1	TF	0.762699	1.81714e-133	6.0945e-129	Cilliated epithelial cells
STAT1	TF	1.14397	0	0	Macrophages
STAT1	TF	1.24172	9.4009e-81	3.15297e-76	Myeloid DCs
STAT1	TF	1.08649	0	0	Neutrophils
STAT1	TF	1.08379	4.57617e-41	1.5348e-36	NK cells
STAT1	TF	1.26315	1.66202e-148	5.57423e-144	Plasma cells
STAT1	TF	0.722408	1.37514e-132	4.61209e-128	Secretory epithelial cells
STAT2	TF	0.680766	2.11481e-52	7.09285e-48	CD4 T cells
STAT2	TF	0.567129	2.5178e-99	8.44445e-95	CD8 T cells
STAT2	TF	0.452479	9.09212e-76	3.04941e-71	Cilliated epithelial cells
STAT2	TF	0.862223	0	0	Macrophages
STAT2	TF	0.660347	2.70568e-17	9.07459e-13	NK cells
STAT2	TF	0.644887	2.94676e-55	9.88315e-51	Plasma cells
STAT2	TF	0.44382	3.82197e-77	1.28185e-72	Secretory epithelial cells
STAT3	TF	0.34574	3.9402e-32	1.3215e-27	CD4 T cells
STAT3	TF	0.390572	5.69154e-103	1.90889e-98	CD8 T cells
STAT3	TF	0.343303	1.78434e-39	5.98449e-35	Cilliated epithelial cells
STAT3	TF	0.536095	0	0	Macrophages
STAT3	TF	0.565429	6.23992e-231	2.09281e-226	Neutrophils
STAT3	TF	0.554393	2.0426e-63	6.85067e-59	Plasma cells
STAT3	TF	0.340402	2.77426e-44	9.30459e-40	Secretory epithelial cells
STAT6	TF	0.314903	0	0	Macrophages
STAT6	TF	0.327317	6.68016e-88	2.24046e-83	Neutrophils
STAT6	TF	0.376161	4.17148e-74	1.39907e-69	Secretory epithelial cells
TBX21	TF	0.428804	4.29542e-116	1.44064e-111	CD8 T cells
TBX21	TF	0.643747	4.86239e-24	1.6308e-19	NK cells
TFAP2A	TF	0.250288	4.46135e-63	1.49629e-58	Secretory epithelial cells
TGIF1	TF	0.251905	5.32517e-209	1.78601e-204	Macrophages
TGIF1	TF	0.302898	3.28976e-69	1.10335e-64	Neutrophils
USF2	TF	0.0934102	8.06478e-39	2.70484e-34	Macrophages
USF2	TF	0.0809507	1.30396e-21	4.37336e-17	Neutrophils
XBP1	TF	0.0787089	1.54039e-29	5.16632e-25	Macrophages
XBP1	TF	0.0346769	7.28805e-11	2.44434e-06	Neutrophils
XBP1	TF	0.373813	1.59843e-08	0.000536098	NK cells
XBP1	TF	1.09595	5.5474e-80	1.86054e-75	Plasma cells
XBP1	TF	0.0151795	1.13807e-22	3.81698e-18	Secretory epithelial cells
YY1	TF	0.0117691	1.57413e-34	5.27948e-30	CD8 T cells
YY1	TF	0.0525305	4.66039e-31	1.56305e-26	Macrophages
YY1	TF	0.0891644	5.56802e-14	1.86746e-09	Neutrophils
YY1	TF	-0.0587061	2.20156e-17	7.38381e-13	Plasma cells
YY1	TF	0.0307936	1.82155e-05	0.610929	Secretory epithelial cells
ZBTB7A	TF	0.109931	5.54651e-11	1.86024e-06	Secretory epithelial cells
ZDHHC5	TF	0.113494	4.65712e-128	1.56195e-123	Macrophages
ZDHHC7	TF	0.0835563	1.65135e-137	5.53847e-133	Macrophages
ZDHHC7	TF	0.189927	2.38043e-47	7.98372e-43	Secretory epithelial cells
ZNF281	TF	0.0253453	0.000128179	1	Secretory epithelial cells
ZNF524	TF	0.0174765	3.27177e-39	1.09732e-34	Macrophages
ZNF622	TF	0.0600465	3.93365e-78	1.31931e-73	Macrophages
ZNF710	TF	0.0889269	1.62664e-28	5.45559e-24	Secretory epithelial cells
AHR	TF - druggable	0.0717683	1.00676e-33	3.37659e-29	Macrophages
AHR	TF - druggable	0.0198142	5.15234e-17	1.72804e-12	Neutrophils
AHR	TF - druggable	0.329815	1.56327e-45	5.24306e-41	Secretory epithelial cells
ATF2	TF - druggable	0.0578466	7.93667e-44	2.66188e-39	Macrophages
ATF2	TF - druggable	0.0547307	3.1612e-09	0.000106023	Neutrophils
ATF2	TF - druggable	0.0872309	5.94546e-10	1.99405e-05	Secretory epithelial cells
ATF3	TF - druggable	0.312669	2.4742e-43	8.29823e-39	CD8 T cells
ATF3	TF - druggable	0.970198	0	0	Macrophages
ATF3	TF - druggable	1.29485	0	0	Neutrophils
ATF3	TF - druggable	0.447865	1.41662e-38	4.75119e-34	Plasma cells
ATF3	TF - druggable	1.18327	3.59211e-110	1.20476e-105	Secretory epithelial cells
ATF4	TF - druggable	0.0755039	2.83038e-32	9.4928e-28	Macrophages
ATF4	TF - druggable	0.0827278	3.46238e-14	1.16125e-09	Neutrophils
ATF4	TF - druggable	0.389152	1.82878e-29	6.13354e-25	Secretory epithelial cells
ATF7	TF - druggable	0.0539022	5.27481e-42	1.76912e-37	Macrophages
CREB1	TF - druggable	0.136297	4.4786e-32	1.50208e-27	CD8 T cells
CREB1	TF - druggable	0.0656574	2.74996e-44	9.2231e-40	Macrophages
CREB1	TF - druggable	0.00797884	7.13903e-09	0.000239436	Neutrophils
CREB1	TF - druggable	0.0817521	2.60183e-08	0.000872628	Secretory epithelial cells
FOS	TF - druggable	0.900662	2.0556e-37	6.89428e-33	CD4 T cells
FOS	TF - druggable	0.669359	1.83381e-31	6.15041e-27	CD8 T cells
FOS	TF - druggable	0.697829	1.92654e-28	6.46142e-24	Cilliated epithelial cells
FOS	TF - druggable	0.912025	0	0	Macrophages
FOS	TF - druggable	0.976615	0	0	Neutrophils
FOS	TF - druggable	1.10057	7.23417e-55	2.42627e-50	Plasma cells
FOS	TF - druggable	0.191691	0.0347878	1	Secretory epithelial cells
HIF1A	TF - druggable	0.520583	3.09745e-45	1.03885e-40	CD4 T cells
HIF1A	TF - druggable	0.642573	1.09248e-126	3.66406e-122	CD8 T cells
HIF1A	TF - druggable	1.03453	0	0	Macrophages
HIF1A	TF - druggable	0.645576	1.65697e-46	5.55731e-42	Myeloid DCs
HIF1A	TF - druggable	1.26929	0	0	Neutrophils
HIF1A	TF - druggable	0.972814	4.57628e-35	1.53484e-30	NK cells
HIF1A	TF - druggable	0.799222	8.46189e-77	2.83803e-72	Plasma cells
HIF1A	TF - druggable	0.335355	3.61603e-43	1.21278e-38	Secretory epithelial cells
JUN	TF - druggable	0.42023	2.93041e-16	9.82831e-12	CD4 T cells
JUN	TF - druggable	0.300806	3.64308e-32	1.22185e-27	CD8 T cells
JUN	TF - druggable	1.23258	1.87227e-93	6.27939e-89	Cilliated epithelial cells
JUN	TF - druggable	1.07973	0	0	Macrophages
JUN	TF - druggable	0.860443	5.3372e-297	1.79004e-292	Neutrophils
JUN	TF - druggable	0.304879	0.000187197	1	NK cells
JUN	TF - druggable	1.15785	2.13034e-72	7.14494e-68	Plasma cells
JUN	TF - druggable	0.862719	1.61576e-93	5.41911e-89	Secretory epithelial cells
MYC	TF - druggable	0.425354	2.30783e-112	7.74024e-108	Secretory epithelial cells
NFKB1	TF - druggable	0.264424	3.55437e-56	1.1921e-51	CD8 T cells
NFKB1	TF - druggable	0.376998	0	0	Macrophages
NFKB1	TF - druggable	0.867302	3.27383e-48	1.09801e-43	Myeloid DCs
NFKB1	TF - druggable	0.539029	3.53166e-193	1.18448e-188	Neutrophils
NFKB1	TF - druggable	0.543641	6.23285e-16	2.09044e-11	NK cells
NFKB1	TF - druggable	0.337622	1.48781e-33	4.98996e-29	Plasma cells
NFKB1	TF - druggable	0.272768	2.74915e-40	9.22038e-36	Secretory epithelial cells
NFKB2	TF - druggable	0.390337	0	0	Macrophages
NFKB2	TF - druggable	0.441547	2.21629e-211	7.43322e-207	Neutrophils
NFKB2	TF - druggable	0.384084	4.76812e-61	1.59918e-56	Plasma cells
NFKB2	TF - druggable	0.512103	1.14986e-98	3.8565e-94	Secretory epithelial cells
NR3C1	TF - druggable	0.13053	1.87515e-26	6.28906e-22	CD4 T cells
NR3C1	TF - druggable	0.0116382	1.08636e-38	3.64354e-34	CD8 T cells
NR3C1	TF - druggable	-0.0216773	5.25109e-13	1.76116e-08	Cilliated epithelial cells
NR3C1	TF - druggable	0.274903	1.07522e-229	3.60618e-225	Macrophages
NR3C1	TF - druggable	0.32379	5.81581e-88	1.95056e-83	Neutrophils
NR3C1	TF - druggable	0.114814	3.73863e-09	0.00012539	NK cells
NR3C1	TF - druggable	0.00879244	2.93624e-07	0.00984787	Secretory epithelial cells
NR4A3	TF - druggable	0.388897	4.33238e-139	1.45304e-134	Neutrophils
RELA	TF - druggable	0.214842	8.06246e-58	2.70407e-53	CD8 T cells
RELA	TF - druggable	0.237375	2.37018e-44	7.94933e-40	Cilliated epithelial cells
RELA	TF - druggable	0.308084	0	0	Macrophages
RELA	TF - druggable	0.422851	1.94299e-171	6.51659e-167	Neutrophils
RELA	TF - druggable	0.0789391	4.25557e-07	0.0142728	NK cells
RELA	TF - druggable	0.231284	1.37234e-36	4.60268e-32	Plasma cells
RELA	TF - druggable	0.242082	2.19871e-48	7.37427e-44	Secretory epithelial cells
RORA	TF - druggable	0.314929	1.51817e-19	5.09179e-15	Plasma cells
RXRA	TF - druggable	-0.0227253	3.41838e-14	1.14649e-09	Macrophages
RXRA	TF - druggable	-0.00214696	4.25627e-18	1.42751e-13	Neutrophils
RXRA	TF - druggable	-0.0595345	8.93092e-09	0.000299534	Secretory epithelial cells
STAT5B	TF - druggable	0.125827	1.93638e-33	6.49442e-29	CD8 T cells
THRB	TF - druggable	0.376609	8.60019e-115	2.88442e-110	Secretory epithelial cells
